# Supplementary material for: PIO and IBO analysis to unravel the hidden details of the CO2 sequestration mechanism of aromatically tempered N/B-based IFLPs
Source: Royal Society of Chemistry journal article supplement (doi:10.1039/d3cp02928j), 2023-01-01

## Electronic Supplementary Information

### PIO and IBO Analysis to Unravel the Hidden Details of CO<sub>2</sub> Sequestration

#### Mechanism by Aromatically Tempered N/B based IFLPs

Mohmmad Faizan, Adarsh Kumar, Mucherla Raghasudha and Ravinder Pawar\*

Laboratory of Advanced Computation and Theory for Materials and Chemistry,

Department of Chemistry, National Institute of Technology Warangal (NITW), Warangal,  
Telangana-506004, India.

[ravinder\\_pawar@nitw.ac.in](mailto:ravinder_pawar@nitw.ac.in)

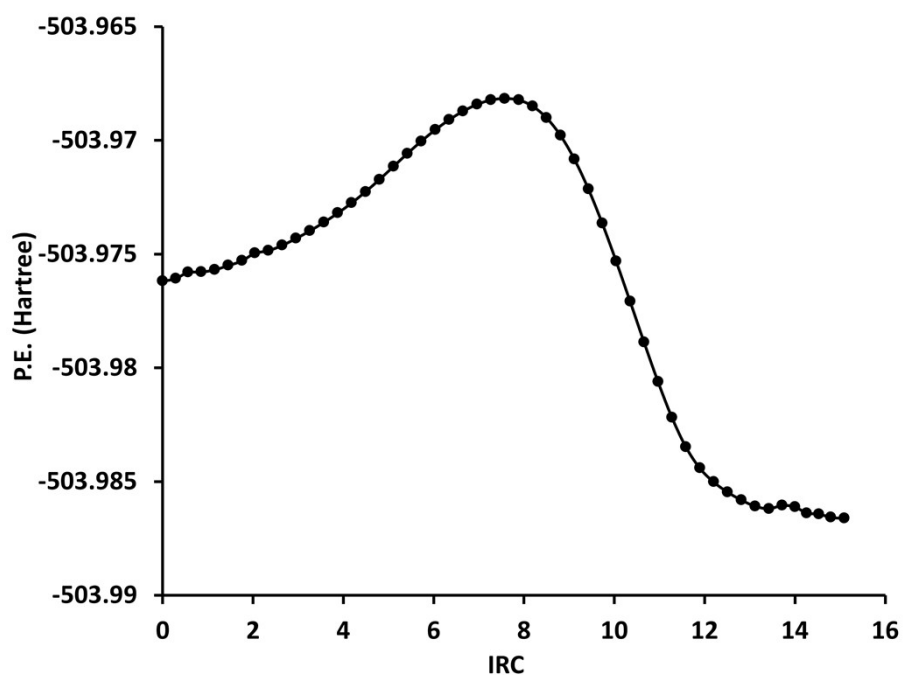

**Figure S1.** The IRC plot for the reaction of CO<sub>2</sub> with 1 in gas phase.

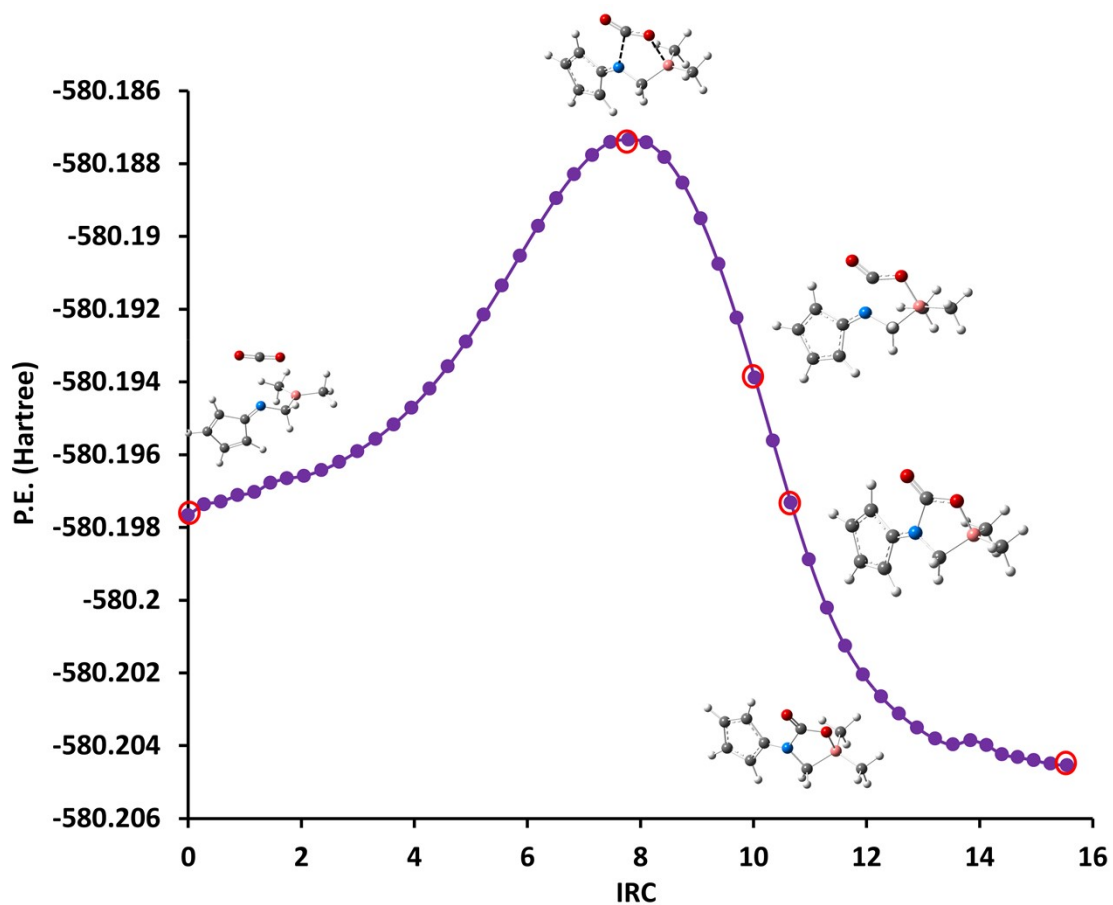

**Figure S2.** The IRC plot for the reaction of CO<sub>2</sub> with 3 in gas phase along with expected asynchronous stages observed in the reaction highlighted by red circles on the curve.

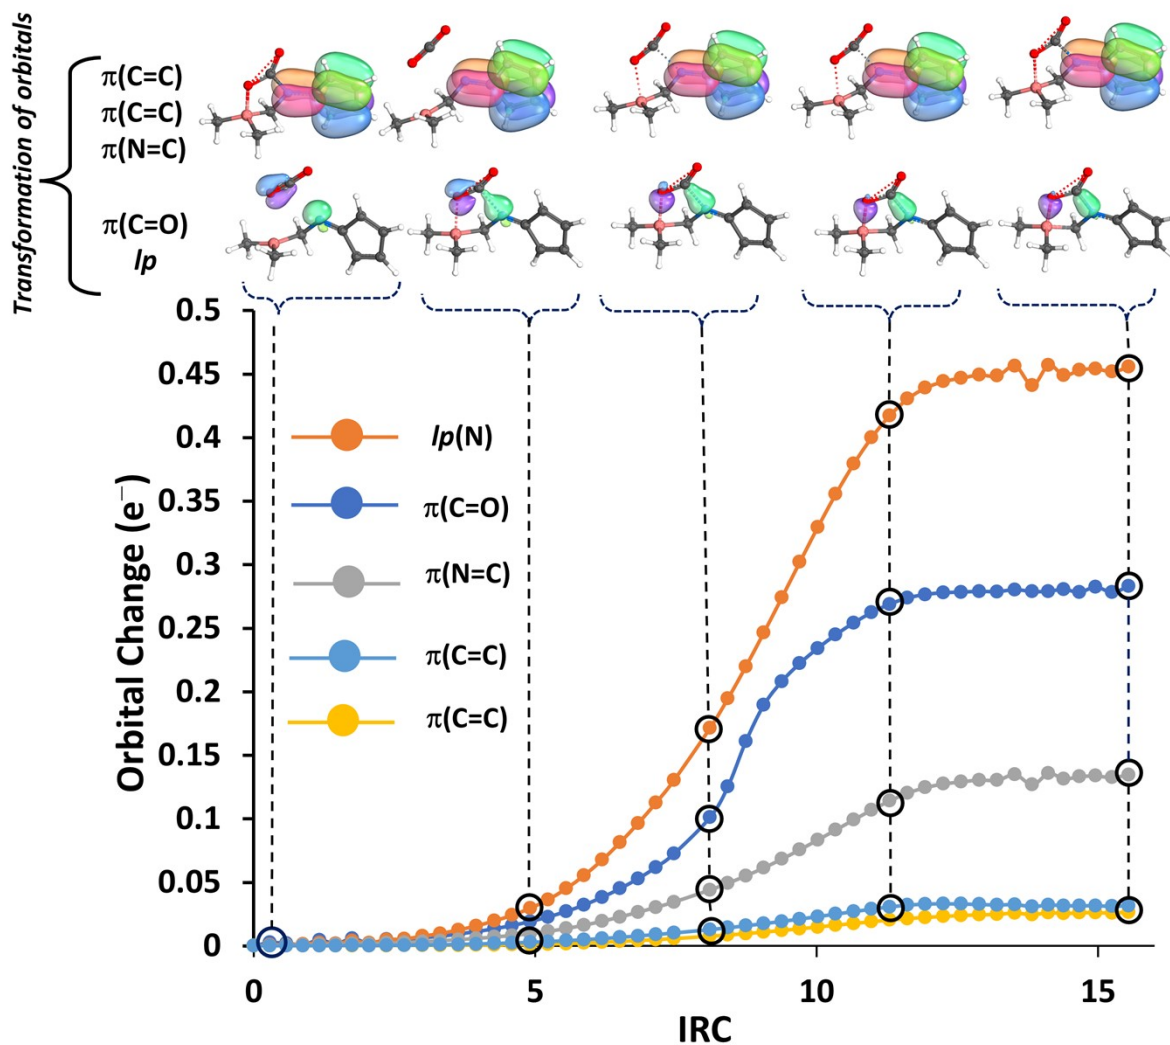

**Figure S3.** The orbital change plot for the reaction of CO<sub>2</sub> with 3. The images of transformation of important orbitals are also given and indicated on the curves at respective the points.

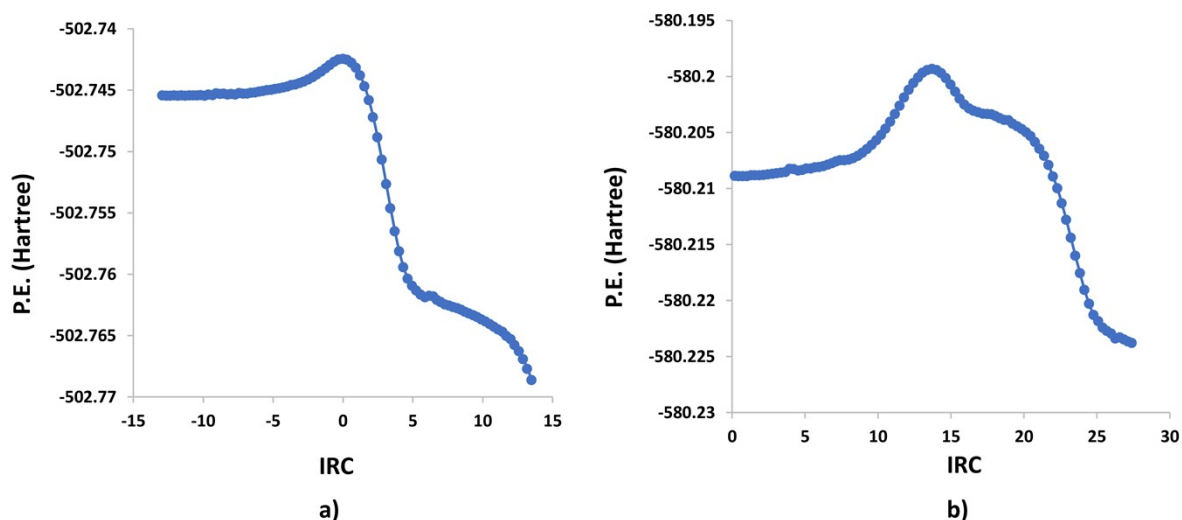

**Figure S4.** The IRC plot for the reaction of CO<sub>2</sub> with 2 and 3 in acetonitrile solvent.

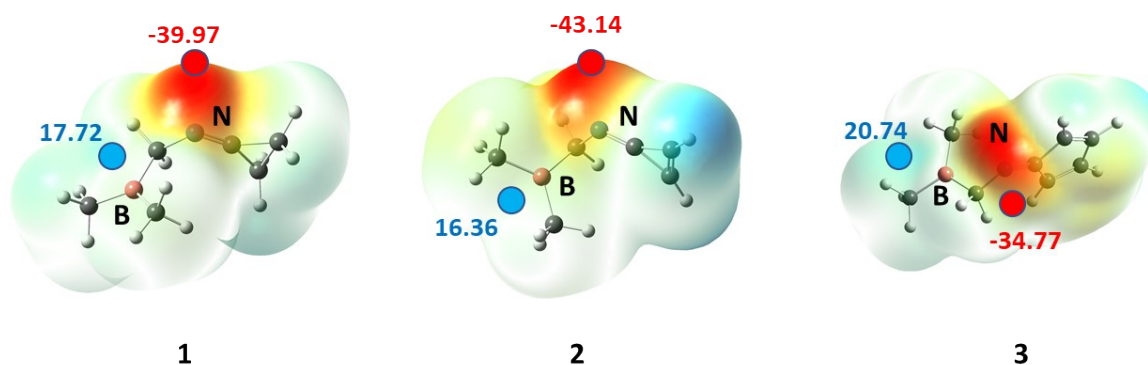

**Figure S5.** MESP surface of 1, 2 and 3 plotted at 0.01 a.u. iso value. Number in red shows the minima associated to the N atoms while the Numbers in blue shows the maxima associated to the B atoms. All the values are given in kcal/mol.

It can be seen from the Figure S5 that the minima at N is most negative in case of **2** which hints toward the increased basicity due to the aromaticity in the system. In case of **3** the minima associated with N was found to be -34.77 kcal/mol which least among the considered systems. This observation point towards the decreased reactivity of N atom in **3** because of the antiaromaticity in the system. Thus, MESP analysis also provides some insights regarding the effect of aromaticity on the catalytic activity of the FLPs.

**Table S1.** Relative free energies of the structures obtained in the reaction of CO<sub>2</sub> with 2 and 3 in gas, acetonitrile and toluene solvents. All the values are given in kcal/mol.

|                 | Gas  | Acetonitrile | Toluene |
|-----------------|------|--------------|---------|
| <b>2</b>        |      |              |         |
| CM <sub>2</sub> | 1.50 | 2.94         | 2.02    |

|                       |       |        |        |
|-----------------------|-------|--------|--------|
| <b>TS<sub>2</sub></b> | 6.96  | 4.87   | 5.33   |
| <b>AD<sub>2</sub></b> | -5.86 | -18.38 | -12.33 |
| <hr/>                 |       |        |        |
| <b>3</b>              |       |        |        |
| <b>CM<sub>3</sub></b> | 3.55  | 2.92   | 4.23   |
| <b>TS<sub>3</sub></b> | 14.69 | 11.20  | 14.81  |
| <b>AD<sub>3</sub></b> | 7.11  | -0.56  | 3.83   |
| <hr/>                 |       |        |        |

# Cartesian Coordinates of the optimized geometries obtained in the reaction of IFLPs with CO<sub>2</sub> in gas phase

1

|                                                                                     |                                                                                                                                                                                                                                                                                                                                                                                                                                                                                                                                                                                                                                                                                                                                                                                                                                                                                                                                                 |
|-------------------------------------------------------------------------------------|-------------------------------------------------------------------------------------------------------------------------------------------------------------------------------------------------------------------------------------------------------------------------------------------------------------------------------------------------------------------------------------------------------------------------------------------------------------------------------------------------------------------------------------------------------------------------------------------------------------------------------------------------------------------------------------------------------------------------------------------------------------------------------------------------------------------------------------------------------------------------------------------------------------------------------------------------|
| <b>1</b>                                                                            |                                                                                                                                                                                                                                                                                                                                                                                                                                                                                                                                                                                                                                                                                                                                                                                                                                                                                                                                                 |
| 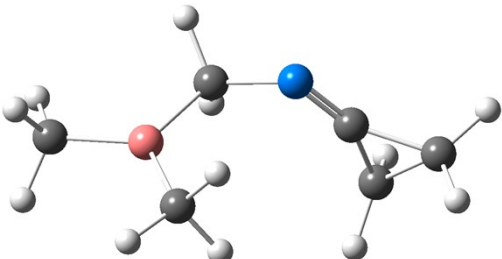   | C -0.58557500 0.93740100 0.41278400<br>H -0.34806700 1.50097400 -0.50644500<br>H -0.98742000 1.67099300 1.12000000<br>B -1.74001400 -0.06666400 0.02098400<br>N 0.59146800 0.32114000 0.99817600<br>C 1.57984400 0.14139400 0.25771800<br>C 2.92872100 -0.38428300 0.13691100<br>C 2.20861100 0.28192300 -1.06152000<br>H 3.06777400 -1.45733500 0.09956600<br>H 3.74356400 0.16640300 0.58936900<br>H 2.56357700 1.25644400 -1.37282000<br>H 1.88553000 -0.36391200 -1.86870200<br>C -1.47032300 -1.60728900 0.03800800<br>H -1.02343900 -1.90849500 0.98958200<br>H -2.33911100 -2.22911500 -0.17584500<br>H -0.69975200 -1.82812200 -0.71183700<br>C -3.12748200 0.52370800 -0.41124700<br>H -3.14812600 1.60563000 -0.54688500<br>H -3.50474900 0.04175700 -1.31685400<br>H -3.85276800 0.27299100 0.37279600                                                                                                                               |
| Zero-point correction=                                                              | 0.169470 (Hartree/Particle)                                                                                                                                                                                                                                                                                                                                                                                                                                                                                                                                                                                                                                                                                                                                                                                                                                                                                                                     |
| Thermal correction to Energy=                                                       | 0.179928                                                                                                                                                                                                                                                                                                                                                                                                                                                                                                                                                                                                                                                                                                                                                                                                                                                                                                                                        |
| Thermal correction to Enthalpy=                                                     | 0.180872                                                                                                                                                                                                                                                                                                                                                                                                                                                                                                                                                                                                                                                                                                                                                                                                                                                                                                                                        |
| Thermal correction to Gibbs Free Energy=                                            | 0.132817                                                                                                                                                                                                                                                                                                                                                                                                                                                                                                                                                                                                                                                                                                                                                                                                                                                                                                                                        |
| Sum of electronic and zero-point Energies=                                          | -315.202828                                                                                                                                                                                                                                                                                                                                                                                                                                                                                                                                                                                                                                                                                                                                                                                                                                                                                                                                     |
| Sum of electronic and thermal Energies=                                             | -315.192369                                                                                                                                                                                                                                                                                                                                                                                                                                                                                                                                                                                                                                                                                                                                                                                                                                                                                                                                     |
| Sum of electronic and thermal Enthalpies=                                           | -315.191425                                                                                                                                                                                                                                                                                                                                                                                                                                                                                                                                                                                                                                                                                                                                                                                                                                                                                                                                     |
| Sum of electronic and thermal Free Energies=                                        | -315.239480                                                                                                                                                                                                                                                                                                                                                                                                                                                                                                                                                                                                                                                                                                                                                                                                                                                                                                                                     |
| <b>CM<sub>1</sub></b>                                                               |                                                                                                                                                                                                                                                                                                                                                                                                                                                                                                                                                                                                                                                                                                                                                                                                                                                                                                                                                 |
|  | C -0.24443000 -1.01646300 -0.94408800<br>H 0.23985200 -2.00591900 -1.01600700<br>H -0.72446300 -0.83028700 -1.90881000<br>B -1.35811500 -1.15849500 0.17275100<br>N 0.71569100 0.04396500 -0.69593000<br>C 1.84961300 -0.26102300 -0.27267200<br>C 3.13946900 0.21782100 0.19151700<br>C 2.80812300 -1.29389200 0.13235000<br>H 3.20007600 0.67848800 1.16933800<br>H 3.84518400 0.59611500 -0.53687800<br>H 3.30252300 -1.87959400 -0.63241200<br>H 2.65476500 -1.80727500 1.07348700<br>C -0.94004800 2.16897100 -0.12298900<br>O -1.81569800 1.54300400 -0.55103100<br>O -0.11717000 2.84075600 0.32514100<br>C -2.69168500 -1.88932700 -0.20462300<br>H -2.61621500 -2.54941900 -1.07022300<br>H -3.15014500 -2.42738700 0.62638600<br>H -3.39409100 -1.09103100 -0.48036500<br>C -1.09753900 -0.67105900 1.63918100<br>H -2.01293800 -0.41242800 2.17399800<br>H -0.66651000 -1.52885300 2.17489600<br>H -0.37537800 0.14205100 1.72942100 |
| Zero-point correction=                                                              | 0.182761 (Hartree/Particle)                                                                                                                                                                                                                                                                                                                                                                                                                                                                                                                                                                                                                                                                                                                                                                                                                                                                                                                     |

|                                                                                     |                             |             |             |             |
|-------------------------------------------------------------------------------------|-----------------------------|-------------|-------------|-------------|
| Thermal correction to Energy=                                                       | 0.197090                    |             |             |             |
| Thermal correction to Enthalpy=                                                     | 0.198034                    |             |             |             |
| Thermal correction to Gibbs Free Energy=                                            | 0.139403                    |             |             |             |
| Sum of electronic and zero-point Energies=                                          | -503.795607                 |             |             |             |
| Sum of electronic and thermal Energies=                                             | -503.781278                 |             |             |             |
| Sum of electronic and thermal Enthalpies=                                           | -503.780333                 |             |             |             |
| Sum of electronic and thermal Free Energies=                                        | -503.838964                 |             |             |             |
| <b>TS<sub>1</sub></b>                                                               |                             |             |             |             |
| 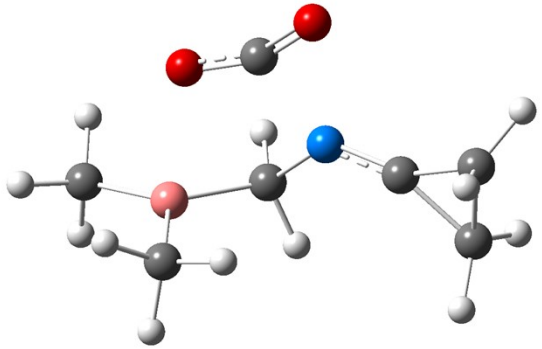   | C                           | -0.53425900 | -0.95691900 | -0.86712400 |
|                                                                                     | H                           | -0.24286100 | -2.01119700 | -0.79136100 |
|                                                                                     | H                           | -0.77598100 | -0.74024600 | -1.91054800 |
|                                                                                     | B                           | -1.78953700 | -0.64102100 | 0.08545700  |
|                                                                                     | N                           | 0.56432200  | -0.09111400 | -0.48698800 |
|                                                                                     | C                           | 1.71218200  | -0.47723600 | -0.19231500 |
|                                                                                     | C                           | 3.02629600  | -0.08121300 | 0.27274300  |
|                                                                                     | C                           | 2.68494400  | -1.55481600 | -0.03814100 |
|                                                                                     | H                           | 3.13321100  | 0.20478000  | 1.31095000  |
|                                                                                     | H                           | 3.67334000  | 0.44332200  | -0.41783300 |
|                                                                                     | H                           | 3.11085600  | -1.99348700 | -0.93126600 |
|                                                                                     | H                           | 2.56880000  | -2.23162400 | 0.79872700  |
|                                                                                     | C                           | -0.07827100 | 1.71385100  | -0.07667800 |
|                                                                                     | O                           | -1.25379700 | 1.52830500  | -0.11636200 |
|                                                                                     | O                           | 0.87498100  | 2.37559800  | 0.08600300  |
|                                                                                     | C                           | -3.22804100 | -0.66377600 | -0.54376500 |
|                                                                                     | H                           | -3.48913400 | -1.70575400 | -0.76757400 |
|                                                                                     | H                           | -4.00004800 | -0.27708700 | 0.12188200  |
| H                                                                                   | -3.27544800                 | -0.12198700 | -1.48989000 |             |
| C                                                                                   | -1.58447000                 | -0.74115700 | 1.64269700  |             |
| H                                                                                   | -2.24740700                 | -0.06499200 | 2.18449500  |             |
| H                                                                                   | -1.85744700                 | -1.75717200 | 1.95343900  |             |
| H                                                                                   | -0.56020400                 | -0.56528400 | 1.97897500  |             |
| Zero-point correction=                                                              | 0.183609 (Hartree/Particle) |             |             |             |
| Thermal correction to Energy=                                                       | 0.196507                    |             |             |             |
| Thermal correction to Enthalpy=                                                     | 0.197452                    |             |             |             |
| Thermal correction to Gibbs Free Energy=                                            | 0.143982                    |             |             |             |
| Sum of electronic and zero-point Energies=                                          | -503.784547                 |             |             |             |
| Sum of electronic and thermal Energies=                                             | -503.771649                 |             |             |             |
| Sum of electronic and thermal Enthalpies=                                           | -503.770704                 |             |             |             |
| Sum of electronic and thermal Free Energies=                                        | -503.824174                 |             |             |             |
| <b>AD<sub>1</sub></b>                                                               |                             |             |             |             |
|  | C                           | -0.51965900 | -1.03716300 | -0.71603400 |
|                                                                                     | H                           | -0.26170400 | -2.04984100 | -0.41123600 |
|                                                                                     | H                           | -0.62784100 | -0.99103000 | -1.80298500 |
|                                                                                     | B                           | -1.79885900 | -0.31181100 | 0.05277400  |
|                                                                                     | N                           | 0.56862500  | -0.13005300 | -0.35479200 |
|                                                                                     | C                           | 1.77764000  | -0.38937600 | -0.13299300 |
|                                                                                     | C                           | 3.05885200  | 0.10815300  | 0.29809400  |
|                                                                                     | C                           | 2.84844400  | -1.36383600 | -0.10701500 |
|                                                                                     | H                           | 3.17698900  | 0.33906600  | 1.34922200  |
|                                                                                     | H                           | 3.59085600  | 0.76154200  | -0.38101200 |
|                                                                                     | H                           | 3.24853500  | -1.69796800 | -1.05606400 |
|                                                                                     | H                           | 2.82806900  | -2.11022000 | 0.67716400  |
|                                                                                     | C                           | 0.02159800  | 1.28122100  | -0.07681100 |
|                                                                                     | O                           | -1.23356200 | 1.18415200  | -0.00055400 |
|                                                                                     | O                           | 0.80046000  | 2.17861600  | 0.01735400  |
|                                                                                     | C                           | -3.17046100 | -0.36510900 | -0.76552800 |
|                                                                                     | H                           | -3.53851300 | -1.39309600 | -0.83980900 |
|                                                                                     | H                           | -3.95453600 | 0.21572100  | -0.27330200 |
| H                                                                                   | -3.06992300                 | 0.01824200  | -1.78529100 |             |

|                                              |                             |             |             |            |
|----------------------------------------------|-----------------------------|-------------|-------------|------------|
|                                              | C                           | -1.88040700 | -0.73285000 | 1.60394100 |
|                                              | H                           | -2.57562700 | -0.09437900 | 2.15466800 |
|                                              | H                           | -2.23811100 | -1.76157900 | 1.70845100 |
|                                              | H                           | -0.91549900 | -0.67540800 | 2.12354200 |
| Zero-point correction=                       | 0.186958 (Hartree/Particle) |             |             |            |
| Thermal correction to Energy=                | 0.198804                    |             |             |            |
| Thermal correction to Enthalpy=              | 0.199748                    |             |             |            |
| Thermal correction to Gibbs Free Energy=     | 0.149633                    |             |             |            |
| Sum of electronic and zero-point Energies=   | -503.800059                 |             |             |            |
| Sum of electronic and thermal Energies=      | -503.788213                 |             |             |            |
| Sum of electronic and thermal Enthalpies=    | -503.787269                 |             |             |            |
| Sum of electronic and thermal Free Energies= | -503.837384                 |             |             |            |

2

|                                                                                     |                             |             |             |             |
|-------------------------------------------------------------------------------------|-----------------------------|-------------|-------------|-------------|
| 2                                                                                   |                             |             |             |             |
| 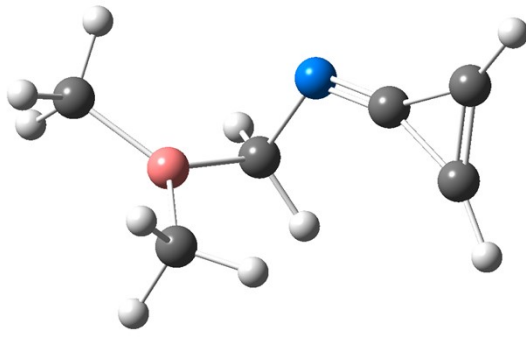  | C                           | -0.54093300 | -0.68084600 | 1.02461700  |
|                                                                                     | H                           | -0.05558700 | -0.11670400 | 1.82994600  |
|                                                                                     | H                           | -0.97828000 | -1.59059200 | 1.43822600  |
|                                                                                     | B                           | -1.52912200 | 0.16821400  | 0.12435800  |
|                                                                                     | N                           | 0.41136400  | -1.06817900 | -0.03248700 |
|                                                                                     | C                           | 1.47304300  | -0.39856200 | -0.10712600 |
|                                                                                     | C                           | 2.71881700  | -0.12376800 | -0.72987900 |
|                                                                                     | C                           | 2.40059700  | 0.60554800  | 0.32925100  |
|                                                                                     | H                           | 3.44850400  | -0.31729800 | -1.49957200 |
|                                                                                     | H                           | 2.70691400  | 1.40262900  | 0.98737900  |
|                                                                                     | C                           | -1.26522300 | 1.70671400  | -0.05351600 |
|                                                                                     | H                           | -0.25571500 | 2.02109600  | 0.21795600  |
|                                                                                     | H                           | -1.50482400 | 2.08041000  | -1.05040300 |
|                                                                                     | H                           | -1.94849100 | 2.22130600  | 0.63607000  |
|                                                                                     | C                           | -2.71708900 | -0.56479600 | -0.58848400 |
|                                                                                     | H                           | -3.20635100 | 0.00344300  | -1.37961300 |
|                                                                                     | H                           | -2.38106200 | -1.52437500 | -0.99015600 |
|                                                                                     | H                           | -3.47432100 | -0.80947100 | 0.16660000  |
| Zero-point correction=                                                              | 0.146108 (Hartree/Particle) |             |             |             |
| Thermal correction to Energy=                                                       | 0.156273                    |             |             |             |
| Thermal correction to Enthalpy=                                                     | 0.157217                    |             |             |             |
| Thermal correction to Gibbs Free Energy=                                            | 0.109963                    |             |             |             |
| Sum of electronic and zero-point Energies=                                          | -313.978206                 |             |             |             |
| Sum of electronic and thermal Energies=                                             | -313.968042                 |             |             |             |
| Sum of electronic and thermal Enthalpies=                                           | -313.967098                 |             |             |             |
| Sum of electronic and thermal Free Energies=                                        | -314.014352                 |             |             |             |
| CM <sub>2</sub>                                                                     |                             |             |             |             |
|  | C                           | 0.23214700  | -1.03696200 | -0.88299900 |
|                                                                                     | H                           | 0.65925100  | -0.86342800 | -1.87627900 |
|                                                                                     | H                           | -0.19607500 | -2.05574800 | -0.91974400 |
|                                                                                     | B                           | 1.40147700  | -1.09756500 | 0.17902000  |
|                                                                                     | N                           | -0.77997500 | -0.02197100 | -0.62822900 |
|                                                                                     | C                           | -1.91224300 | -0.39104600 | -0.23655000 |
|                                                                                     | C                           | -3.23091800 | -0.08598200 | 0.19328300  |
|                                                                                     | C                           | -2.90087600 | -1.36668200 | 0.12721800  |
|                                                                                     | H                           | -3.99938500 | 0.63249100  | 0.42836000  |
|                                                                                     | H                           | -3.23372600 | -2.38110900 | 0.27660000  |
|                                                                                     | C                           | 1.19575600  | -0.58403200 | 1.64630600  |
|                                                                                     | H                           | 0.92717400  | -1.45876800 | 2.25437600  |
|                                                                                     | H                           | 2.11365500  | -0.18838900 | 2.08604700  |
|                                                                                     | H                           | 0.38958900  | 0.14195100  | 1.76141600  |



|                                                                                     |             |             |             |             |
|-------------------------------------------------------------------------------------|-------------|-------------|-------------|-------------|
|                                                                                     | C           | 2.75705400  | -1.76089400 | -0.24872300 |
|                                                                                     | H           | 2.67433400  | -2.45225800 | -1.08930100 |
|                                                                                     | H           | 3.39212800  | -0.93187400 | -0.58957000 |
|                                                                                     | H           | 3.29417900  | -2.24324100 | 0.56930000  |
|                                                                                     | C           | 0.68713000  | 2.19379500  | -0.14278400 |
|                                                                                     | O           | 1.60969200  | 1.64077100  | -0.57211700 |
|                                                                                     | O           | -0.17681500 | 2.81333000  | 0.30546700  |
| Zero-point correction= 0.159001 (Hartree/Particle)                                  |             |             |             |             |
| Thermal correction to Energy= 0.172928                                              |             |             |             |             |
| Thermal correction to Enthalpy= 0.173872                                            |             |             |             |             |
| Thermal correction to Gibbs Free Energy= 0.116196                                   |             |             |             |             |
| Sum of electronic and zero-point Energies= -502.574799                              |             |             |             |             |
| Sum of electronic and thermal Energies= -502.560872                                 |             |             |             |             |
| Sum of electronic and thermal Enthalpies= -502.559928                               |             |             |             |             |
| Sum of electronic and thermal Free Energies= -502.617604                            |             |             |             |             |
| <b>TS<sub>2</sub></b>                                                               |             |             |             |             |
| 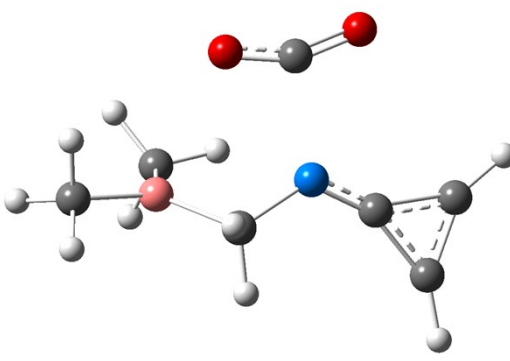  | C           | 0.57564200  | -0.98066100 | -0.80352100 |
|                                                                                     | H           | 0.82806600  | -0.79005600 | -1.85054200 |
|                                                                                     | H           | 0.35588100  | -2.05609700 | -0.72093300 |
|                                                                                     | B           | 1.82189200  | -0.66780900 | 0.13516800  |
|                                                                                     | N           | -0.58235600 | -0.17730500 | -0.45756400 |
|                                                                                     | C           | -1.70960600 | -0.65067000 | -0.17114800 |
|                                                                                     | C           | -3.04265200 | -0.42460200 | 0.23614000  |
|                                                                                     | C           | -2.67183400 | -1.67937100 | 0.02901500  |
|                                                                                     | H           | -3.82021500 | 0.26553400  | 0.51712400  |
|                                                                                     | H           | -2.95480000 | -2.71900000 | 0.02861700  |
|                                                                                     | C           | 1.62059200  | -0.44276400 | 1.67344600  |
|                                                                                     | H           | 1.88674800  | -1.37738700 | 2.18385300  |
|                                                                                     | H           | 2.30690800  | 0.31407400  | 2.05871900  |
|                                                                                     | H           | 0.60424600  | -0.17967500 | 1.96944900  |
|                                                                                     | C           | 3.25756000  | -0.72969900 | -0.48904300 |
|                                                                                     | H           | 3.34291600  | -1.41800300 | -1.33274400 |
|                                                                                     | H           | 3.43978300  | 0.27416800  | -0.89447600 |
|                                                                                     | H           | 4.05316500  | -0.93331200 | 0.22811600  |
|                                                                                     | C           | -0.19058000 | 1.76416200  | -0.14445600 |
| O                                                                                   | 0.97541900  | 1.78612500  | -0.32839100 |             |
| O                                                                                   | -1.23921800 | 2.22157100  | 0.12305600  |             |
| Zero-point correction= 0.159393 (Hartree/Particle)                                  |             |             |             |             |
| Thermal correction to Energy= 0.172141                                              |             |             |             |             |
| Thermal correction to Enthalpy= 0.173085                                            |             |             |             |             |
| Thermal correction to Gibbs Free Energy= 0.119566                                   |             |             |             |             |
| Sum of electronic and zero-point Energies= -502.569078                              |             |             |             |             |
| Sum of electronic and thermal Energies= -502.556331                                 |             |             |             |             |
| Sum of electronic and thermal Enthalpies= -502.555387                               |             |             |             |             |
| Sum of electronic and thermal Free Energies= -502.608905                            |             |             |             |             |
| <b>AD<sub>2</sub></b>                                                               |             |             |             |             |
|  | C           | -0.45332100 | -1.19396700 | -0.36102600 |
|                                                                                     | H           | -0.29741500 | -2.05030200 | 0.29552800  |
|                                                                                     | H           | -0.43541300 | -1.52515600 | -1.40194400 |
|                                                                                     | B           | -1.77790000 | -0.26712600 | 0.02863200  |
|                                                                                     | N           | 0.64108900  | -0.23094000 | -0.16783400 |
|                                                                                     | C           | 1.89201100  | -0.45616900 | -0.06002200 |
|                                                                                     | C           | 3.18345700  | 0.02675700  | 0.13132700  |
|                                                                                     | C           | 3.01502300  | -1.28401400 | -0.01980000 |
|                                                                                     | H           | 3.82424500  | 0.87757300  | 0.28610000  |
|                                                                                     | H           | 3.44101900  | -2.27158400 | -0.07414400 |
|                                                                                     | C           | -2.19971200 | -0.45248500 | 1.57167900  |
|                                                                                     | H           | -1.35039800 | -0.36602700 | 2.26060800  |
|                                                                                     | H           | -2.93894700 | 0.29136600  | 1.87984500  |

|                                              |                             |             |             |             |
|----------------------------------------------|-----------------------------|-------------|-------------|-------------|
|                                              | H                           | -2.64679400 | -1.43787300 | 1.73717600  |
|                                              | C                           | -2.97198700 | -0.36457600 | -1.03500200 |
|                                              | H                           | -3.78361100 | 0.32781600  | -0.79701100 |
|                                              | H                           | -2.64573800 | -0.14771300 | -2.05707500 |
|                                              | H                           | -3.40486400 | -1.37015200 | -1.04038300 |
|                                              | C                           | 0.15773700  | 1.18180700  | -0.08082200 |
|                                              | O                           | -1.10601600 | 1.17021600  | -0.09880600 |
|                                              | O                           | 0.96858500  | 2.06480400  | -0.01807300 |
| Zero-point correction=                       | 0.163965 (Hartree/Particle) |             |             |             |
| Thermal correction to Energy=                | 0.175339                    |             |             |             |
| Thermal correction to Enthalpy=              | 0.176283                    |             |             |             |
| Thermal correction to Gibbs Free Energy=     | 0.126872                    |             |             |             |
| Sum of electronic and zero-point Energies=   | -502.592230                 |             |             |             |
| Sum of electronic and thermal Energies=      | -502.580856                 |             |             |             |
| Sum of electronic and thermal Enthalpies=    | -502.579912                 |             |             |             |
| Sum of electronic and thermal Free Energies= | -502.629323                 |             |             |             |

3

|                                              |                             |             |             |             |
|----------------------------------------------|-----------------------------|-------------|-------------|-------------|
| <b>3</b>                                     |                             |             |             |             |
|                                              | C                           | -2.25172000 | -0.86514700 | 0.57072900  |
|                                              | C                           | -3.13206000 | 0.11692600  | 0.35209500  |
|                                              | C                           | -2.50082000 | 1.14630300  | -0.50674000 |
|                                              | C                           | -1.24715200 | 0.78261700  | -0.80705500 |
|                                              | H                           | -2.37212900 | -1.76692900 | 1.14956500  |
|                                              | H                           | -4.14322300 | 0.17663000  | 0.72578700  |
|                                              | H                           | -2.99724500 | 2.04932200  | -0.83215000 |
|                                              | H                           | -0.54454200 | 1.33065400  | -1.41394000 |
|                                              | C                           | -0.99378400 | -0.52153600 | -0.13603200 |
|                                              | N                           | 0.04436800  | -1.24886000 | -0.09275600 |
|                                              | C                           | 1.25403500  | -0.82604400 | -0.74607500 |
|                                              | H                           | 1.80986400  | -1.71232100 | -1.06803700 |
|                                              | H                           | 1.07599800  | -0.23547600 | -1.65896400 |
|                                              | B                           | 2.21925400  | 0.06383800  | 0.14482300  |
|                                              | C                           | 3.66020100  | 0.35371800  | -0.39963600 |
|                                              | H                           | 4.37180400  | -0.17055000 | 0.25010100  |
|                                              | H                           | 3.84419700  | 0.02731800  | -1.42366600 |
|                                              | H                           | 3.91507800  | 1.41274800  | -0.30929500 |
|                                              | C                           | 1.71315600  | 0.64216900  | 1.50461800  |
|                                              | H                           | 1.32925700  | -0.16387500 | 2.13781100  |
|                                              | H                           | 2.45194700  | 1.21987700  | 2.05879100  |
|                                              | H                           | 0.84100400  | 1.28139000  | 1.31775800  |
| Zero-point correction=                       | 0.182591 (Hartree/Particle) |             |             |             |
| Thermal correction to Energy=                | 0.193736                    |             |             |             |
| Thermal correction to Enthalpy=              | 0.194681                    |             |             |             |
| Thermal correction to Gibbs Free Energy=     | 0.144937                    |             |             |             |
| Sum of electronic and zero-point Energies=   | -391.411231                 |             |             |             |
| Sum of electronic and thermal Energies=      | -391.400086                 |             |             |             |
| Sum of electronic and thermal Enthalpies=    | -391.399142                 |             |             |             |
| Sum of electronic and thermal Free Energies= | -391.448885                 |             |             |             |
| <b>CM<sub>3</sub></b>                        |                             |             |             |             |
|                                              | C                           | 2.31108700  | 0.96984700  | -0.11035100 |
|                                              | C                           | 3.44332700  | 0.38926200  | 0.29881400  |
|                                              | C                           | 3.27600100  | -1.08312100 | 0.24860500  |

|                                                                                                                                                                                                                                                                                                                                                                                                                                                          |                                                                                                                                                                                                                                                                                                                                                                                                                                                                                                                                                                                                                                                                                                                                                                                                                                                                                                                                                                                                                                                                                                                                                                                                                                                                                                                                                                                                                                                                                                                                                                                                                                                                                                                                                                                                                                                                                                                                                                                                                                                                                               |             |             |             |             |   |            |            |             |   |            |             |            |   |            |             |             |   |            |             |             |   |            |             |             |   |            |             |             |   |             |             |             |   |             |             |             |   |             |             |             |   |             |             |             |   |             |             |             |   |             |             |             |   |             |             |             |   |             |             |             |   |             |             |            |   |             |             |             |   |             |             |             |   |             |             |            |   |             |             |            |   |             |             |            |   |             |             |             |   |             |            |             |   |             |            |             |   |             |            |            |
|----------------------------------------------------------------------------------------------------------------------------------------------------------------------------------------------------------------------------------------------------------------------------------------------------------------------------------------------------------------------------------------------------------------------------------------------------------|-----------------------------------------------------------------------------------------------------------------------------------------------------------------------------------------------------------------------------------------------------------------------------------------------------------------------------------------------------------------------------------------------------------------------------------------------------------------------------------------------------------------------------------------------------------------------------------------------------------------------------------------------------------------------------------------------------------------------------------------------------------------------------------------------------------------------------------------------------------------------------------------------------------------------------------------------------------------------------------------------------------------------------------------------------------------------------------------------------------------------------------------------------------------------------------------------------------------------------------------------------------------------------------------------------------------------------------------------------------------------------------------------------------------------------------------------------------------------------------------------------------------------------------------------------------------------------------------------------------------------------------------------------------------------------------------------------------------------------------------------------------------------------------------------------------------------------------------------------------------------------------------------------------------------------------------------------------------------------------------------------------------------------------------------------------------------------------------------|-------------|-------------|-------------|-------------|---|------------|------------|-------------|---|------------|-------------|------------|---|------------|-------------|-------------|---|------------|-------------|-------------|---|------------|-------------|-------------|---|------------|-------------|-------------|---|-------------|-------------|-------------|---|-------------|-------------|-------------|---|-------------|-------------|-------------|---|-------------|-------------|-------------|---|-------------|-------------|-------------|---|-------------|-------------|-------------|---|-------------|-------------|-------------|---|-------------|-------------|-------------|---|-------------|-------------|------------|---|-------------|-------------|-------------|---|-------------|-------------|-------------|---|-------------|-------------|------------|---|-------------|-------------|------------|---|-------------|-------------|------------|---|-------------|-------------|-------------|---|-------------|------------|-------------|---|-------------|------------|-------------|---|-------------|------------|------------|
| 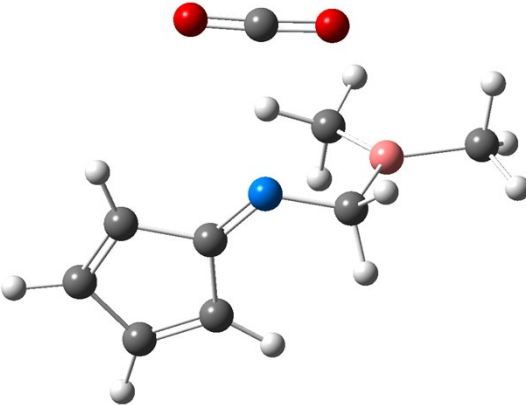                                                                                                                                                                                                                                                                                                                                                                        | <table border="1"> <tbody> <tr><td>C</td><td>2.04842000</td><td>-1.38777800</td><td>-0.19120400</td></tr> <tr><td>H</td><td>2.07590900</td><td>2.01898600</td><td>-0.19402900</td></tr> <tr><td>H</td><td>4.34694000</td><td>0.88549000</td><td>0.61952800</td></tr> <tr><td>H</td><td>4.04479600</td><td>-1.78864200</td><td>0.52945200</td></tr> <tr><td>H</td><td>1.63909200</td><td>-2.37479500</td><td>-0.33228700</td></tr> <tr><td>C</td><td>1.34282600</td><td>-0.10324900</td><td>-0.44519700</td></tr> <tr><td>N</td><td>0.16001500</td><td>0.13435100</td><td>-0.83658300</td></tr> <tr><td>C</td><td>-0.77927900</td><td>-0.92882200</td><td>-1.06832800</td></tr> <tr><td>H</td><td>-1.41489100</td><td>-0.65463800</td><td>-1.91439000</td></tr> <tr><td>H</td><td>-0.30484800</td><td>-1.88847500</td><td>-1.32788200</td></tr> <tr><td>B</td><td>-1.71256900</td><td>-1.24206100</td><td>0.18098000</td></tr> <tr><td>C</td><td>-3.05210600</td><td>-2.00695000</td><td>-0.08588100</td></tr> <tr><td>H</td><td>-3.34067600</td><td>-2.67504300</td><td>0.72701000</td></tr> <tr><td>H</td><td>-3.82800400</td><td>-1.23089400</td><td>-0.13428700</td></tr> <tr><td>H</td><td>-3.08844900</td><td>-2.54624000</td><td>-1.03351900</td></tr> <tr><td>C</td><td>-1.25073600</td><td>-0.88259300</td><td>1.63152400</td></tr> <tr><td>H</td><td>-0.65067500</td><td>0.02634800</td><td>1.70334900</td></tr> <tr><td>H</td><td>-2.06696200</td><td>-0.84548700</td><td>2.35362000</td></tr> <tr><td>H</td><td>-0.58653600</td><td>-1.69889200</td><td>1.95134700</td></tr> <tr><td>C</td><td>-1.50192000</td><td>2.17822000</td><td>0.00580000</td></tr> <tr><td>O</td><td>-0.65401100</td><td>2.90225200</td><td>0.29991600</td></tr> <tr><td>O</td><td>-2.39707200</td><td>1.49440300</td><td>-0.26234400</td></tr> </tbody> </table>                                                                                                                                                                                                                                          | C           | 2.04842000  | -1.38777800 | -0.19120400 | H | 2.07590900 | 2.01898600 | -0.19402900 | H | 4.34694000 | 0.88549000  | 0.61952800 | H | 4.04479600 | -1.78864200 | 0.52945200  | H | 1.63909200 | -2.37479500 | -0.33228700 | C | 1.34282600 | -0.10324900 | -0.44519700 | N | 0.16001500 | 0.13435100  | -0.83658300 | C | -0.77927900 | -0.92882200 | -1.06832800 | H | -1.41489100 | -0.65463800 | -1.91439000 | H | -0.30484800 | -1.88847500 | -1.32788200 | B | -1.71256900 | -1.24206100 | 0.18098000  | C | -3.05210600 | -2.00695000 | -0.08588100 | H | -3.34067600 | -2.67504300 | 0.72701000  | H | -3.82800400 | -1.23089400 | -0.13428700 | H | -3.08844900 | -2.54624000 | -1.03351900 | C | -1.25073600 | -0.88259300 | 1.63152400 | H | -0.65067500 | 0.02634800  | 1.70334900  | H | -2.06696200 | -0.84548700 | 2.35362000  | H | -0.58653600 | -1.69889200 | 1.95134700 | C | -1.50192000 | 2.17822000  | 0.00580000 | O | -0.65401100 | 2.90225200  | 0.29991600 | O | -2.39707200 | 1.49440300  | -0.26234400 |   |             |            |             |   |             |            |             |   |             |            |            |
| C                                                                                                                                                                                                                                                                                                                                                                                                                                                        | 2.04842000                                                                                                                                                                                                                                                                                                                                                                                                                                                                                                                                                                                                                                                                                                                                                                                                                                                                                                                                                                                                                                                                                                                                                                                                                                                                                                                                                                                                                                                                                                                                                                                                                                                                                                                                                                                                                                                                                                                                                                                                                                                                                    | -1.38777800 | -0.19120400 |             |             |   |            |            |             |   |            |             |            |   |            |             |             |   |            |             |             |   |            |             |             |   |            |             |             |   |             |             |             |   |             |             |             |   |             |             |             |   |             |             |             |   |             |             |             |   |             |             |             |   |             |             |             |   |             |             |             |   |             |             |            |   |             |             |             |   |             |             |             |   |             |             |            |   |             |             |            |   |             |             |            |   |             |             |             |   |             |            |             |   |             |            |             |   |             |            |            |
| H                                                                                                                                                                                                                                                                                                                                                                                                                                                        | 2.07590900                                                                                                                                                                                                                                                                                                                                                                                                                                                                                                                                                                                                                                                                                                                                                                                                                                                                                                                                                                                                                                                                                                                                                                                                                                                                                                                                                                                                                                                                                                                                                                                                                                                                                                                                                                                                                                                                                                                                                                                                                                                                                    | 2.01898600  | -0.19402900 |             |             |   |            |            |             |   |            |             |            |   |            |             |             |   |            |             |             |   |            |             |             |   |            |             |             |   |             |             |             |   |             |             |             |   |             |             |             |   |             |             |             |   |             |             |             |   |             |             |             |   |             |             |             |   |             |             |             |   |             |             |            |   |             |             |             |   |             |             |             |   |             |             |            |   |             |             |            |   |             |             |            |   |             |             |             |   |             |            |             |   |             |            |             |   |             |            |            |
| H                                                                                                                                                                                                                                                                                                                                                                                                                                                        | 4.34694000                                                                                                                                                                                                                                                                                                                                                                                                                                                                                                                                                                                                                                                                                                                                                                                                                                                                                                                                                                                                                                                                                                                                                                                                                                                                                                                                                                                                                                                                                                                                                                                                                                                                                                                                                                                                                                                                                                                                                                                                                                                                                    | 0.88549000  | 0.61952800  |             |             |   |            |            |             |   |            |             |            |   |            |             |             |   |            |             |             |   |            |             |             |   |            |             |             |   |             |             |             |   |             |             |             |   |             |             |             |   |             |             |             |   |             |             |             |   |             |             |             |   |             |             |             |   |             |             |             |   |             |             |            |   |             |             |             |   |             |             |             |   |             |             |            |   |             |             |            |   |             |             |            |   |             |             |             |   |             |            |             |   |             |            |             |   |             |            |            |
| H                                                                                                                                                                                                                                                                                                                                                                                                                                                        | 4.04479600                                                                                                                                                                                                                                                                                                                                                                                                                                                                                                                                                                                                                                                                                                                                                                                                                                                                                                                                                                                                                                                                                                                                                                                                                                                                                                                                                                                                                                                                                                                                                                                                                                                                                                                                                                                                                                                                                                                                                                                                                                                                                    | -1.78864200 | 0.52945200  |             |             |   |            |            |             |   |            |             |            |   |            |             |             |   |            |             |             |   |            |             |             |   |            |             |             |   |             |             |             |   |             |             |             |   |             |             |             |   |             |             |             |   |             |             |             |   |             |             |             |   |             |             |             |   |             |             |             |   |             |             |            |   |             |             |             |   |             |             |             |   |             |             |            |   |             |             |            |   |             |             |            |   |             |             |             |   |             |            |             |   |             |            |             |   |             |            |            |
| H                                                                                                                                                                                                                                                                                                                                                                                                                                                        | 1.63909200                                                                                                                                                                                                                                                                                                                                                                                                                                                                                                                                                                                                                                                                                                                                                                                                                                                                                                                                                                                                                                                                                                                                                                                                                                                                                                                                                                                                                                                                                                                                                                                                                                                                                                                                                                                                                                                                                                                                                                                                                                                                                    | -2.37479500 | -0.33228700 |             |             |   |            |            |             |   |            |             |            |   |            |             |             |   |            |             |             |   |            |             |             |   |            |             |             |   |             |             |             |   |             |             |             |   |             |             |             |   |             |             |             |   |             |             |             |   |             |             |             |   |             |             |             |   |             |             |             |   |             |             |            |   |             |             |             |   |             |             |             |   |             |             |            |   |             |             |            |   |             |             |            |   |             |             |             |   |             |            |             |   |             |            |             |   |             |            |            |
| C                                                                                                                                                                                                                                                                                                                                                                                                                                                        | 1.34282600                                                                                                                                                                                                                                                                                                                                                                                                                                                                                                                                                                                                                                                                                                                                                                                                                                                                                                                                                                                                                                                                                                                                                                                                                                                                                                                                                                                                                                                                                                                                                                                                                                                                                                                                                                                                                                                                                                                                                                                                                                                                                    | -0.10324900 | -0.44519700 |             |             |   |            |            |             |   |            |             |            |   |            |             |             |   |            |             |             |   |            |             |             |   |            |             |             |   |             |             |             |   |             |             |             |   |             |             |             |   |             |             |             |   |             |             |             |   |             |             |             |   |             |             |             |   |             |             |             |   |             |             |            |   |             |             |             |   |             |             |             |   |             |             |            |   |             |             |            |   |             |             |            |   |             |             |             |   |             |            |             |   |             |            |             |   |             |            |            |
| N                                                                                                                                                                                                                                                                                                                                                                                                                                                        | 0.16001500                                                                                                                                                                                                                                                                                                                                                                                                                                                                                                                                                                                                                                                                                                                                                                                                                                                                                                                                                                                                                                                                                                                                                                                                                                                                                                                                                                                                                                                                                                                                                                                                                                                                                                                                                                                                                                                                                                                                                                                                                                                                                    | 0.13435100  | -0.83658300 |             |             |   |            |            |             |   |            |             |            |   |            |             |             |   |            |             |             |   |            |             |             |   |            |             |             |   |             |             |             |   |             |             |             |   |             |             |             |   |             |             |             |   |             |             |             |   |             |             |             |   |             |             |             |   |             |             |             |   |             |             |            |   |             |             |             |   |             |             |             |   |             |             |            |   |             |             |            |   |             |             |            |   |             |             |             |   |             |            |             |   |             |            |             |   |             |            |            |
| C                                                                                                                                                                                                                                                                                                                                                                                                                                                        | -0.77927900                                                                                                                                                                                                                                                                                                                                                                                                                                                                                                                                                                                                                                                                                                                                                                                                                                                                                                                                                                                                                                                                                                                                                                                                                                                                                                                                                                                                                                                                                                                                                                                                                                                                                                                                                                                                                                                                                                                                                                                                                                                                                   | -0.92882200 | -1.06832800 |             |             |   |            |            |             |   |            |             |            |   |            |             |             |   |            |             |             |   |            |             |             |   |            |             |             |   |             |             |             |   |             |             |             |   |             |             |             |   |             |             |             |   |             |             |             |   |             |             |             |   |             |             |             |   |             |             |             |   |             |             |            |   |             |             |             |   |             |             |             |   |             |             |            |   |             |             |            |   |             |             |            |   |             |             |             |   |             |            |             |   |             |            |             |   |             |            |            |
| H                                                                                                                                                                                                                                                                                                                                                                                                                                                        | -1.41489100                                                                                                                                                                                                                                                                                                                                                                                                                                                                                                                                                                                                                                                                                                                                                                                                                                                                                                                                                                                                                                                                                                                                                                                                                                                                                                                                                                                                                                                                                                                                                                                                                                                                                                                                                                                                                                                                                                                                                                                                                                                                                   | -0.65463800 | -1.91439000 |             |             |   |            |            |             |   |            |             |            |   |            |             |             |   |            |             |             |   |            |             |             |   |            |             |             |   |             |             |             |   |             |             |             |   |             |             |             |   |             |             |             |   |             |             |             |   |             |             |             |   |             |             |             |   |             |             |             |   |             |             |            |   |             |             |             |   |             |             |             |   |             |             |            |   |             |             |            |   |             |             |            |   |             |             |             |   |             |            |             |   |             |            |             |   |             |            |            |
| H                                                                                                                                                                                                                                                                                                                                                                                                                                                        | -0.30484800                                                                                                                                                                                                                                                                                                                                                                                                                                                                                                                                                                                                                                                                                                                                                                                                                                                                                                                                                                                                                                                                                                                                                                                                                                                                                                                                                                                                                                                                                                                                                                                                                                                                                                                                                                                                                                                                                                                                                                                                                                                                                   | -1.88847500 | -1.32788200 |             |             |   |            |            |             |   |            |             |            |   |            |             |             |   |            |             |             |   |            |             |             |   |            |             |             |   |             |             |             |   |             |             |             |   |             |             |             |   |             |             |             |   |             |             |             |   |             |             |             |   |             |             |             |   |             |             |             |   |             |             |            |   |             |             |             |   |             |             |             |   |             |             |            |   |             |             |            |   |             |             |            |   |             |             |             |   |             |            |             |   |             |            |             |   |             |            |            |
| B                                                                                                                                                                                                                                                                                                                                                                                                                                                        | -1.71256900                                                                                                                                                                                                                                                                                                                                                                                                                                                                                                                                                                                                                                                                                                                                                                                                                                                                                                                                                                                                                                                                                                                                                                                                                                                                                                                                                                                                                                                                                                                                                                                                                                                                                                                                                                                                                                                                                                                                                                                                                                                                                   | -1.24206100 | 0.18098000  |             |             |   |            |            |             |   |            |             |            |   |            |             |             |   |            |             |             |   |            |             |             |   |            |             |             |   |             |             |             |   |             |             |             |   |             |             |             |   |             |             |             |   |             |             |             |   |             |             |             |   |             |             |             |   |             |             |             |   |             |             |            |   |             |             |             |   |             |             |             |   |             |             |            |   |             |             |            |   |             |             |            |   |             |             |             |   |             |            |             |   |             |            |             |   |             |            |            |
| C                                                                                                                                                                                                                                                                                                                                                                                                                                                        | -3.05210600                                                                                                                                                                                                                                                                                                                                                                                                                                                                                                                                                                                                                                                                                                                                                                                                                                                                                                                                                                                                                                                                                                                                                                                                                                                                                                                                                                                                                                                                                                                                                                                                                                                                                                                                                                                                                                                                                                                                                                                                                                                                                   | -2.00695000 | -0.08588100 |             |             |   |            |            |             |   |            |             |            |   |            |             |             |   |            |             |             |   |            |             |             |   |            |             |             |   |             |             |             |   |             |             |             |   |             |             |             |   |             |             |             |   |             |             |             |   |             |             |             |   |             |             |             |   |             |             |             |   |             |             |            |   |             |             |             |   |             |             |             |   |             |             |            |   |             |             |            |   |             |             |            |   |             |             |             |   |             |            |             |   |             |            |             |   |             |            |            |
| H                                                                                                                                                                                                                                                                                                                                                                                                                                                        | -3.34067600                                                                                                                                                                                                                                                                                                                                                                                                                                                                                                                                                                                                                                                                                                                                                                                                                                                                                                                                                                                                                                                                                                                                                                                                                                                                                                                                                                                                                                                                                                                                                                                                                                                                                                                                                                                                                                                                                                                                                                                                                                                                                   | -2.67504300 | 0.72701000  |             |             |   |            |            |             |   |            |             |            |   |            |             |             |   |            |             |             |   |            |             |             |   |            |             |             |   |             |             |             |   |             |             |             |   |             |             |             |   |             |             |             |   |             |             |             |   |             |             |             |   |             |             |             |   |             |             |             |   |             |             |            |   |             |             |             |   |             |             |             |   |             |             |            |   |             |             |            |   |             |             |            |   |             |             |             |   |             |            |             |   |             |            |             |   |             |            |            |
| H                                                                                                                                                                                                                                                                                                                                                                                                                                                        | -3.82800400                                                                                                                                                                                                                                                                                                                                                                                                                                                                                                                                                                                                                                                                                                                                                                                                                                                                                                                                                                                                                                                                                                                                                                                                                                                                                                                                                                                                                                                                                                                                                                                                                                                                                                                                                                                                                                                                                                                                                                                                                                                                                   | -1.23089400 | -0.13428700 |             |             |   |            |            |             |   |            |             |            |   |            |             |             |   |            |             |             |   |            |             |             |   |            |             |             |   |             |             |             |   |             |             |             |   |             |             |             |   |             |             |             |   |             |             |             |   |             |             |             |   |             |             |             |   |             |             |             |   |             |             |            |   |             |             |             |   |             |             |             |   |             |             |            |   |             |             |            |   |             |             |            |   |             |             |             |   |             |            |             |   |             |            |             |   |             |            |            |
| H                                                                                                                                                                                                                                                                                                                                                                                                                                                        | -3.08844900                                                                                                                                                                                                                                                                                                                                                                                                                                                                                                                                                                                                                                                                                                                                                                                                                                                                                                                                                                                                                                                                                                                                                                                                                                                                                                                                                                                                                                                                                                                                                                                                                                                                                                                                                                                                                                                                                                                                                                                                                                                                                   | -2.54624000 | -1.03351900 |             |             |   |            |            |             |   |            |             |            |   |            |             |             |   |            |             |             |   |            |             |             |   |            |             |             |   |             |             |             |   |             |             |             |   |             |             |             |   |             |             |             |   |             |             |             |   |             |             |             |   |             |             |             |   |             |             |             |   |             |             |            |   |             |             |             |   |             |             |             |   |             |             |            |   |             |             |            |   |             |             |            |   |             |             |             |   |             |            |             |   |             |            |             |   |             |            |            |
| C                                                                                                                                                                                                                                                                                                                                                                                                                                                        | -1.25073600                                                                                                                                                                                                                                                                                                                                                                                                                                                                                                                                                                                                                                                                                                                                                                                                                                                                                                                                                                                                                                                                                                                                                                                                                                                                                                                                                                                                                                                                                                                                                                                                                                                                                                                                                                                                                                                                                                                                                                                                                                                                                   | -0.88259300 | 1.63152400  |             |             |   |            |            |             |   |            |             |            |   |            |             |             |   |            |             |             |   |            |             |             |   |            |             |             |   |             |             |             |   |             |             |             |   |             |             |             |   |             |             |             |   |             |             |             |   |             |             |             |   |             |             |             |   |             |             |             |   |             |             |            |   |             |             |             |   |             |             |             |   |             |             |            |   |             |             |            |   |             |             |            |   |             |             |             |   |             |            |             |   |             |            |             |   |             |            |            |
| H                                                                                                                                                                                                                                                                                                                                                                                                                                                        | -0.65067500                                                                                                                                                                                                                                                                                                                                                                                                                                                                                                                                                                                                                                                                                                                                                                                                                                                                                                                                                                                                                                                                                                                                                                                                                                                                                                                                                                                                                                                                                                                                                                                                                                                                                                                                                                                                                                                                                                                                                                                                                                                                                   | 0.02634800  | 1.70334900  |             |             |   |            |            |             |   |            |             |            |   |            |             |             |   |            |             |             |   |            |             |             |   |            |             |             |   |             |             |             |   |             |             |             |   |             |             |             |   |             |             |             |   |             |             |             |   |             |             |             |   |             |             |             |   |             |             |             |   |             |             |            |   |             |             |             |   |             |             |             |   |             |             |            |   |             |             |            |   |             |             |            |   |             |             |             |   |             |            |             |   |             |            |             |   |             |            |            |
| H                                                                                                                                                                                                                                                                                                                                                                                                                                                        | -2.06696200                                                                                                                                                                                                                                                                                                                                                                                                                                                                                                                                                                                                                                                                                                                                                                                                                                                                                                                                                                                                                                                                                                                                                                                                                                                                                                                                                                                                                                                                                                                                                                                                                                                                                                                                                                                                                                                                                                                                                                                                                                                                                   | -0.84548700 | 2.35362000  |             |             |   |            |            |             |   |            |             |            |   |            |             |             |   |            |             |             |   |            |             |             |   |            |             |             |   |             |             |             |   |             |             |             |   |             |             |             |   |             |             |             |   |             |             |             |   |             |             |             |   |             |             |             |   |             |             |             |   |             |             |            |   |             |             |             |   |             |             |             |   |             |             |            |   |             |             |            |   |             |             |            |   |             |             |             |   |             |            |             |   |             |            |             |   |             |            |            |
| H                                                                                                                                                                                                                                                                                                                                                                                                                                                        | -0.58653600                                                                                                                                                                                                                                                                                                                                                                                                                                                                                                                                                                                                                                                                                                                                                                                                                                                                                                                                                                                                                                                                                                                                                                                                                                                                                                                                                                                                                                                                                                                                                                                                                                                                                                                                                                                                                                                                                                                                                                                                                                                                                   | -1.69889200 | 1.95134700  |             |             |   |            |            |             |   |            |             |            |   |            |             |             |   |            |             |             |   |            |             |             |   |            |             |             |   |             |             |             |   |             |             |             |   |             |             |             |   |             |             |             |   |             |             |             |   |             |             |             |   |             |             |             |   |             |             |             |   |             |             |            |   |             |             |             |   |             |             |             |   |             |             |            |   |             |             |            |   |             |             |            |   |             |             |             |   |             |            |             |   |             |            |             |   |             |            |            |
| C                                                                                                                                                                                                                                                                                                                                                                                                                                                        | -1.50192000                                                                                                                                                                                                                                                                                                                                                                                                                                                                                                                                                                                                                                                                                                                                                                                                                                                                                                                                                                                                                                                                                                                                                                                                                                                                                                                                                                                                                                                                                                                                                                                                                                                                                                                                                                                                                                                                                                                                                                                                                                                                                   | 2.17822000  | 0.00580000  |             |             |   |            |            |             |   |            |             |            |   |            |             |             |   |            |             |             |   |            |             |             |   |            |             |             |   |             |             |             |   |             |             |             |   |             |             |             |   |             |             |             |   |             |             |             |   |             |             |             |   |             |             |             |   |             |             |             |   |             |             |            |   |             |             |             |   |             |             |             |   |             |             |            |   |             |             |            |   |             |             |            |   |             |             |             |   |             |            |             |   |             |            |             |   |             |            |            |
| O                                                                                                                                                                                                                                                                                                                                                                                                                                                        | -0.65401100                                                                                                                                                                                                                                                                                                                                                                                                                                                                                                                                                                                                                                                                                                                                                                                                                                                                                                                                                                                                                                                                                                                                                                                                                                                                                                                                                                                                                                                                                                                                                                                                                                                                                                                                                                                                                                                                                                                                                                                                                                                                                   | 2.90225200  | 0.29991600  |             |             |   |            |            |             |   |            |             |            |   |            |             |             |   |            |             |             |   |            |             |             |   |            |             |             |   |             |             |             |   |             |             |             |   |             |             |             |   |             |             |             |   |             |             |             |   |             |             |             |   |             |             |             |   |             |             |             |   |             |             |            |   |             |             |             |   |             |             |             |   |             |             |            |   |             |             |            |   |             |             |            |   |             |             |             |   |             |            |             |   |             |            |             |   |             |            |            |
| O                                                                                                                                                                                                                                                                                                                                                                                                                                                        | -2.39707200                                                                                                                                                                                                                                                                                                                                                                                                                                                                                                                                                                                                                                                                                                                                                                                                                                                                                                                                                                                                                                                                                                                                                                                                                                                                                                                                                                                                                                                                                                                                                                                                                                                                                                                                                                                                                                                                                                                                                                                                                                                                                   | 1.49440300  | -0.26234400 |             |             |   |            |            |             |   |            |             |            |   |            |             |             |   |            |             |             |   |            |             |             |   |            |             |             |   |             |             |             |   |             |             |             |   |             |             |             |   |             |             |             |   |             |             |             |   |             |             |             |   |             |             |             |   |             |             |             |   |             |             |            |   |             |             |             |   |             |             |             |   |             |             |            |   |             |             |            |   |             |             |            |   |             |             |             |   |             |            |             |   |             |            |             |   |             |            |            |
| <p>Zero-point correction= 0.195805 (Hartree/Particle)<br/> Thermal correction to Energy= 0.210891<br/> Thermal correction to Enthalpy= 0.211836<br/> Thermal correction to Gibbs Free Energy= 0.151046<br/> Sum of electronic and zero-point Energies= -580.004101<br/> Sum of electronic and thermal Energies= -579.989015<br/> Sum of electronic and thermal Enthalpies= -579.988071<br/> Sum of electronic and thermal Free Energies= -580.048861</p> |                                                                                                                                                                                                                                                                                                                                                                                                                                                                                                                                                                                                                                                                                                                                                                                                                                                                                                                                                                                                                                                                                                                                                                                                                                                                                                                                                                                                                                                                                                                                                                                                                                                                                                                                                                                                                                                                                                                                                                                                                                                                                               |             |             |             |             |   |            |            |             |   |            |             |            |   |            |             |             |   |            |             |             |   |            |             |             |   |            |             |             |   |             |             |             |   |             |             |             |   |             |             |             |   |             |             |             |   |             |             |             |   |             |             |             |   |             |             |             |   |             |             |             |   |             |             |            |   |             |             |             |   |             |             |             |   |             |             |            |   |             |             |            |   |             |             |            |   |             |             |             |   |             |            |             |   |             |            |             |   |             |            |            |
| <b>TS<sub>3</sub></b>                                                                                                                                                                                                                                                                                                                                                                                                                                    |                                                                                                                                                                                                                                                                                                                                                                                                                                                                                                                                                                                                                                                                                                                                                                                                                                                                                                                                                                                                                                                                                                                                                                                                                                                                                                                                                                                                                                                                                                                                                                                                                                                                                                                                                                                                                                                                                                                                                                                                                                                                                               |             |             |             |             |   |            |            |             |   |            |             |            |   |            |             |             |   |            |             |             |   |            |             |             |   |            |             |             |   |             |             |             |   |             |             |             |   |             |             |             |   |             |             |             |   |             |             |             |   |             |             |             |   |             |             |             |   |             |             |             |   |             |             |            |   |             |             |             |   |             |             |             |   |             |             |            |   |             |             |            |   |             |             |            |   |             |             |             |   |             |            |             |   |             |            |             |   |             |            |            |
|                                                                                                                                                                                                                                                                                                                                                                       | <table border="1"> <tbody> <tr><td>C</td><td>2.32218200</td><td>0.86253600</td><td>0.17534400</td></tr> <tr><td>C</td><td>3.48858800</td><td>0.24195100</td><td>0.36868600</td></tr> <tr><td>C</td><td>3.33831700</td><td>-1.20094600</td><td>0.05014800</td></tr> <tr><td>C</td><td>2.08304500</td><td>-1.45213600</td><td>-0.33420800</td></tr> <tr><td>H</td><td>2.07962200</td><td>1.90321200</td><td>0.30731400</td></tr> <tr><td>H</td><td>4.41012900</td><td>0.69506500</td><td>0.70181200</td></tr> <tr><td>H</td><td>4.13816600</td><td>-1.92325900</td><td>0.12336000</td></tr> <tr><td>H</td><td>1.66718700</td><td>-2.39927200</td><td>-0.63344800</td></tr> <tr><td>C</td><td>1.34668200</td><td>-0.16203700</td><td>-0.28186500</td></tr> <tr><td>N</td><td>0.13423000</td><td>0.08326200</td><td>-0.55937800</td></tr> <tr><td>C</td><td>-0.85473000</td><td>-0.89842200</td><td>-0.91510800</td></tr> <tr><td>H</td><td>-1.20850000</td><td>-0.65626400</td><td>-1.92133200</td></tr> <tr><td>H</td><td>-0.45697900</td><td>-1.91707000</td><td>-0.92008400</td></tr> <tr><td>B</td><td>-2.07937300</td><td>-0.76590200</td><td>0.13330300</td></tr> <tr><td>C</td><td>-3.53411900</td><td>-1.05870100</td><td>-0.39756300</td></tr> <tr><td>H</td><td>-4.30904700</td><td>-0.72649500</td><td>0.29503800</td></tr> <tr><td>H</td><td>-3.73141000</td><td>-0.61797200</td><td>-1.37639300</td></tr> <tr><td>H</td><td>-3.65304400</td><td>-2.14299900</td><td>-0.50605800</td></tr> <tr><td>C</td><td>-1.74261900</td><td>-0.96249800</td><td>1.66413900</td></tr> <tr><td>H</td><td>-0.75197700</td><td>-0.60620700</td><td>1.95756300</td></tr> <tr><td>H</td><td>-2.48297300</td><td>-0.49075900</td><td>2.31255900</td></tr> <tr><td>H</td><td>-1.77363900</td><td>-2.03565700</td><td>1.88536400</td></tr> <tr><td>C</td><td>-0.93761500</td><td>1.77317500</td><td>-0.08627600</td></tr> <tr><td>O</td><td>-0.19115200</td><td>2.66566300</td><td>-0.06677900</td></tr> <tr><td>O</td><td>-1.99993200</td><td>1.24769000</td><td>0.01223600</td></tr> </tbody> </table> | C           | 2.32218200  | 0.86253600  | 0.17534400  | C | 3.48858800 | 0.24195100 | 0.36868600  | C | 3.33831700 | -1.20094600 | 0.05014800 | C | 2.08304500 | -1.45213600 | -0.33420800 | H | 2.07962200 | 1.90321200  | 0.30731400  | H | 4.41012900 | 0.69506500  | 0.70181200  | H | 4.13816600 | -1.92325900 | 0.12336000  | H | 1.66718700  | -2.39927200 | -0.63344800 | C | 1.34668200  | -0.16203700 | -0.28186500 | N | 0.13423000  | 0.08326200  | -0.55937800 | C | -0.85473000 | -0.89842200 | -0.91510800 | H | -1.20850000 | -0.65626400 | -1.92133200 | H | -0.45697900 | -1.91707000 | -0.92008400 | B | -2.07937300 | -0.76590200 | 0.13330300  | C | -3.53411900 | -1.05870100 | -0.39756300 | H | -4.30904700 | -0.72649500 | 0.29503800 | H | -3.73141000 | -0.61797200 | -1.37639300 | H | -3.65304400 | -2.14299900 | -0.50605800 | C | -1.74261900 | -0.96249800 | 1.66413900 | H | -0.75197700 | -0.60620700 | 1.95756300 | H | -2.48297300 | -0.49075900 | 2.31255900 | H | -1.77363900 | -2.03565700 | 1.88536400  | C | -0.93761500 | 1.77317500 | -0.08627600 | O | -0.19115200 | 2.66566300 | -0.06677900 | O | -1.99993200 | 1.24769000 | 0.01223600 |
| C                                                                                                                                                                                                                                                                                                                                                                                                                                                        | 2.32218200                                                                                                                                                                                                                                                                                                                                                                                                                                                                                                                                                                                                                                                                                                                                                                                                                                                                                                                                                                                                                                                                                                                                                                                                                                                                                                                                                                                                                                                                                                                                                                                                                                                                                                                                                                                                                                                                                                                                                                                                                                                                                    | 0.86253600  | 0.17534400  |             |             |   |            |            |             |   |            |             |            |   |            |             |             |   |            |             |             |   |            |             |             |   |            |             |             |   |             |             |             |   |             |             |             |   |             |             |             |   |             |             |             |   |             |             |             |   |             |             |             |   |             |             |             |   |             |             |             |   |             |             |            |   |             |             |             |   |             |             |             |   |             |             |            |   |             |             |            |   |             |             |            |   |             |             |             |   |             |            |             |   |             |            |             |   |             |            |            |
| C                                                                                                                                                                                                                                                                                                                                                                                                                                                        | 3.48858800                                                                                                                                                                                                                                                                                                                                                                                                                                                                                                                                                                                                                                                                                                                                                                                                                                                                                                                                                                                                                                                                                                                                                                                                                                                                                                                                                                                                                                                                                                                                                                                                                                                                                                                                                                                                                                                                                                                                                                                                                                                                                    | 0.24195100  | 0.36868600  |             |             |   |            |            |             |   |            |             |            |   |            |             |             |   |            |             |             |   |            |             |             |   |            |             |             |   |             |             |             |   |             |             |             |   |             |             |             |   |             |             |             |   |             |             |             |   |             |             |             |   |             |             |             |   |             |             |             |   |             |             |            |   |             |             |             |   |             |             |             |   |             |             |            |   |             |             |            |   |             |             |            |   |             |             |             |   |             |            |             |   |             |            |             |   |             |            |            |
| C                                                                                                                                                                                                                                                                                                                                                                                                                                                        | 3.33831700                                                                                                                                                                                                                                                                                                                                                                                                                                                                                                                                                                                                                                                                                                                                                                                                                                                                                                                                                                                                                                                                                                                                                                                                                                                                                                                                                                                                                                                                                                                                                                                                                                                                                                                                                                                                                                                                                                                                                                                                                                                                                    | -1.20094600 | 0.05014800  |             |             |   |            |            |             |   |            |             |            |   |            |             |             |   |            |             |             |   |            |             |             |   |            |             |             |   |             |             |             |   |             |             |             |   |             |             |             |   |             |             |             |   |             |             |             |   |             |             |             |   |             |             |             |   |             |             |             |   |             |             |            |   |             |             |             |   |             |             |             |   |             |             |            |   |             |             |            |   |             |             |            |   |             |             |             |   |             |            |             |   |             |            |             |   |             |            |            |
| C                                                                                                                                                                                                                                                                                                                                                                                                                                                        | 2.08304500                                                                                                                                                                                                                                                                                                                                                                                                                                                                                                                                                                                                                                                                                                                                                                                                                                                                                                                                                                                                                                                                                                                                                                                                                                                                                                                                                                                                                                                                                                                                                                                                                                                                                                                                                                                                                                                                                                                                                                                                                                                                                    | -1.45213600 | -0.33420800 |             |             |   |            |            |             |   |            |             |            |   |            |             |             |   |            |             |             |   |            |             |             |   |            |             |             |   |             |             |             |   |             |             |             |   |             |             |             |   |             |             |             |   |             |             |             |   |             |             |             |   |             |             |             |   |             |             |             |   |             |             |            |   |             |             |             |   |             |             |             |   |             |             |            |   |             |             |            |   |             |             |            |   |             |             |             |   |             |            |             |   |             |            |             |   |             |            |            |
| H                                                                                                                                                                                                                                                                                                                                                                                                                                                        | 2.07962200                                                                                                                                                                                                                                                                                                                                                                                                                                                                                                                                                                                                                                                                                                                                                                                                                                                                                                                                                                                                                                                                                                                                                                                                                                                                                                                                                                                                                                                                                                                                                                                                                                                                                                                                                                                                                                                                                                                                                                                                                                                                                    | 1.90321200  | 0.30731400  |             |             |   |            |            |             |   |            |             |            |   |            |             |             |   |            |             |             |   |            |             |             |   |            |             |             |   |             |             |             |   |             |             |             |   |             |             |             |   |             |             |             |   |             |             |             |   |             |             |             |   |             |             |             |   |             |             |             |   |             |             |            |   |             |             |             |   |             |             |             |   |             |             |            |   |             |             |            |   |             |             |            |   |             |             |             |   |             |            |             |   |             |            |             |   |             |            |            |
| H                                                                                                                                                                                                                                                                                                                                                                                                                                                        | 4.41012900                                                                                                                                                                                                                                                                                                                                                                                                                                                                                                                                                                                                                                                                                                                                                                                                                                                                                                                                                                                                                                                                                                                                                                                                                                                                                                                                                                                                                                                                                                                                                                                                                                                                                                                                                                                                                                                                                                                                                                                                                                                                                    | 0.69506500  | 0.70181200  |             |             |   |            |            |             |   |            |             |            |   |            |             |             |   |            |             |             |   |            |             |             |   |            |             |             |   |             |             |             |   |             |             |             |   |             |             |             |   |             |             |             |   |             |             |             |   |             |             |             |   |             |             |             |   |             |             |             |   |             |             |            |   |             |             |             |   |             |             |             |   |             |             |            |   |             |             |            |   |             |             |            |   |             |             |             |   |             |            |             |   |             |            |             |   |             |            |            |
| H                                                                                                                                                                                                                                                                                                                                                                                                                                                        | 4.13816600                                                                                                                                                                                                                                                                                                                                                                                                                                                                                                                                                                                                                                                                                                                                                                                                                                                                                                                                                                                                                                                                                                                                                                                                                                                                                                                                                                                                                                                                                                                                                                                                                                                                                                                                                                                                                                                                                                                                                                                                                                                                                    | -1.92325900 | 0.12336000  |             |             |   |            |            |             |   |            |             |            |   |            |             |             |   |            |             |             |   |            |             |             |   |            |             |             |   |             |             |             |   |             |             |             |   |             |             |             |   |             |             |             |   |             |             |             |   |             |             |             |   |             |             |             |   |             |             |             |   |             |             |            |   |             |             |             |   |             |             |             |   |             |             |            |   |             |             |            |   |             |             |            |   |             |             |             |   |             |            |             |   |             |            |             |   |             |            |            |
| H                                                                                                                                                                                                                                                                                                                                                                                                                                                        | 1.66718700                                                                                                                                                                                                                                                                                                                                                                                                                                                                                                                                                                                                                                                                                                                                                                                                                                                                                                                                                                                                                                                                                                                                                                                                                                                                                                                                                                                                                                                                                                                                                                                                                                                                                                                                                                                                                                                                                                                                                                                                                                                                                    | -2.39927200 | -0.63344800 |             |             |   |            |            |             |   |            |             |            |   |            |             |             |   |            |             |             |   |            |             |             |   |            |             |             |   |             |             |             |   |             |             |             |   |             |             |             |   |             |             |             |   |             |             |             |   |             |             |             |   |             |             |             |   |             |             |             |   |             |             |            |   |             |             |             |   |             |             |             |   |             |             |            |   |             |             |            |   |             |             |            |   |             |             |             |   |             |            |             |   |             |            |             |   |             |            |            |
| C                                                                                                                                                                                                                                                                                                                                                                                                                                                        | 1.34668200                                                                                                                                                                                                                                                                                                                                                                                                                                                                                                                                                                                                                                                                                                                                                                                                                                                                                                                                                                                                                                                                                                                                                                                                                                                                                                                                                                                                                                                                                                                                                                                                                                                                                                                                                                                                                                                                                                                                                                                                                                                                                    | -0.16203700 | -0.28186500 |             |             |   |            |            |             |   |            |             |            |   |            |             |             |   |            |             |             |   |            |             |             |   |            |             |             |   |             |             |             |   |             |             |             |   |             |             |             |   |             |             |             |   |             |             |             |   |             |             |             |   |             |             |             |   |             |             |             |   |             |             |            |   |             |             |             |   |             |             |             |   |             |             |            |   |             |             |            |   |             |             |            |   |             |             |             |   |             |            |             |   |             |            |             |   |             |            |            |
| N                                                                                                                                                                                                                                                                                                                                                                                                                                                        | 0.13423000                                                                                                                                                                                                                                                                                                                                                                                                                                                                                                                                                                                                                                                                                                                                                                                                                                                                                                                                                                                                                                                                                                                                                                                                                                                                                                                                                                                                                                                                                                                                                                                                                                                                                                                                                                                                                                                                                                                                                                                                                                                                                    | 0.08326200  | -0.55937800 |             |             |   |            |            |             |   |            |             |            |   |            |             |             |   |            |             |             |   |            |             |             |   |            |             |             |   |             |             |             |   |             |             |             |   |             |             |             |   |             |             |             |   |             |             |             |   |             |             |             |   |             |             |             |   |             |             |             |   |             |             |            |   |             |             |             |   |             |             |             |   |             |             |            |   |             |             |            |   |             |             |            |   |             |             |             |   |             |            |             |   |             |            |             |   |             |            |            |
| C                                                                                                                                                                                                                                                                                                                                                                                                                                                        | -0.85473000                                                                                                                                                                                                                                                                                                                                                                                                                                                                                                                                                                                                                                                                                                                                                                                                                                                                                                                                                                                                                                                                                                                                                                                                                                                                                                                                                                                                                                                                                                                                                                                                                                                                                                                                                                                                                                                                                                                                                                                                                                                                                   | -0.89842200 | -0.91510800 |             |             |   |            |            |             |   |            |             |            |   |            |             |             |   |            |             |             |   |            |             |             |   |            |             |             |   |             |             |             |   |             |             |             |   |             |             |             |   |             |             |             |   |             |             |             |   |             |             |             |   |             |             |             |   |             |             |             |   |             |             |            |   |             |             |             |   |             |             |             |   |             |             |            |   |             |             |            |   |             |             |            |   |             |             |             |   |             |            |             |   |             |            |             |   |             |            |            |
| H                                                                                                                                                                                                                                                                                                                                                                                                                                                        | -1.20850000                                                                                                                                                                                                                                                                                                                                                                                                                                                                                                                                                                                                                                                                                                                                                                                                                                                                                                                                                                                                                                                                                                                                                                                                                                                                                                                                                                                                                                                                                                                                                                                                                                                                                                                                                                                                                                                                                                                                                                                                                                                                                   | -0.65626400 | -1.92133200 |             |             |   |            |            |             |   |            |             |            |   |            |             |             |   |            |             |             |   |            |             |             |   |            |             |             |   |             |             |             |   |             |             |             |   |             |             |             |   |             |             |             |   |             |             |             |   |             |             |             |   |             |             |             |   |             |             |             |   |             |             |            |   |             |             |             |   |             |             |             |   |             |             |            |   |             |             |            |   |             |             |            |   |             |             |             |   |             |            |             |   |             |            |             |   |             |            |            |
| H                                                                                                                                                                                                                                                                                                                                                                                                                                                        | -0.45697900                                                                                                                                                                                                                                                                                                                                                                                                                                                                                                                                                                                                                                                                                                                                                                                                                                                                                                                                                                                                                                                                                                                                                                                                                                                                                                                                                                                                                                                                                                                                                                                                                                                                                                                                                                                                                                                                                                                                                                                                                                                                                   | -1.91707000 | -0.92008400 |             |             |   |            |            |             |   |            |             |            |   |            |             |             |   |            |             |             |   |            |             |             |   |            |             |             |   |             |             |             |   |             |             |             |   |             |             |             |   |             |             |             |   |             |             |             |   |             |             |             |   |             |             |             |   |             |             |             |   |             |             |            |   |             |             |             |   |             |             |             |   |             |             |            |   |             |             |            |   |             |             |            |   |             |             |             |   |             |            |             |   |             |            |             |   |             |            |            |
| B                                                                                                                                                                                                                                                                                                                                                                                                                                                        | -2.07937300                                                                                                                                                                                                                                                                                                                                                                                                                                                                                                                                                                                                                                                                                                                                                                                                                                                                                                                                                                                                                                                                                                                                                                                                                                                                                                                                                                                                                                                                                                                                                                                                                                                                                                                                                                                                                                                                                                                                                                                                                                                                                   | -0.76590200 | 0.13330300  |             |             |   |            |            |             |   |            |             |            |   |            |             |             |   |            |             |             |   |            |             |             |   |            |             |             |   |             |             |             |   |             |             |             |   |             |             |             |   |             |             |             |   |             |             |             |   |             |             |             |   |             |             |             |   |             |             |             |   |             |             |            |   |             |             |             |   |             |             |             |   |             |             |            |   |             |             |            |   |             |             |            |   |             |             |             |   |             |            |             |   |             |            |             |   |             |            |            |
| C                                                                                                                                                                                                                                                                                                                                                                                                                                                        | -3.53411900                                                                                                                                                                                                                                                                                                                                                                                                                                                                                                                                                                                                                                                                                                                                                                                                                                                                                                                                                                                                                                                                                                                                                                                                                                                                                                                                                                                                                                                                                                                                                                                                                                                                                                                                                                                                                                                                                                                                                                                                                                                                                   | -1.05870100 | -0.39756300 |             |             |   |            |            |             |   |            |             |            |   |            |             |             |   |            |             |             |   |            |             |             |   |            |             |             |   |             |             |             |   |             |             |             |   |             |             |             |   |             |             |             |   |             |             |             |   |             |             |             |   |             |             |             |   |             |             |             |   |             |             |            |   |             |             |             |   |             |             |             |   |             |             |            |   |             |             |            |   |             |             |            |   |             |             |             |   |             |            |             |   |             |            |             |   |             |            |            |
| H                                                                                                                                                                                                                                                                                                                                                                                                                                                        | -4.30904700                                                                                                                                                                                                                                                                                                                                                                                                                                                                                                                                                                                                                                                                                                                                                                                                                                                                                                                                                                                                                                                                                                                                                                                                                                                                                                                                                                                                                                                                                                                                                                                                                                                                                                                                                                                                                                                                                                                                                                                                                                                                                   | -0.72649500 | 0.29503800  |             |             |   |            |            |             |   |            |             |            |   |            |             |             |   |            |             |             |   |            |             |             |   |            |             |             |   |             |             |             |   |             |             |             |   |             |             |             |   |             |             |             |   |             |             |             |   |             |             |             |   |             |             |             |   |             |             |             |   |             |             |            |   |             |             |             |   |             |             |             |   |             |             |            |   |             |             |            |   |             |             |            |   |             |             |             |   |             |            |             |   |             |            |             |   |             |            |            |
| H                                                                                                                                                                                                                                                                                                                                                                                                                                                        | -3.73141000                                                                                                                                                                                                                                                                                                                                                                                                                                                                                                                                                                                                                                                                                                                                                                                                                                                                                                                                                                                                                                                                                                                                                                                                                                                                                                                                                                                                                                                                                                                                                                                                                                                                                                                                                                                                                                                                                                                                                                                                                                                                                   | -0.61797200 | -1.37639300 |             |             |   |            |            |             |   |            |             |            |   |            |             |             |   |            |             |             |   |            |             |             |   |            |             |             |   |             |             |             |   |             |             |             |   |             |             |             |   |             |             |             |   |             |             |             |   |             |             |             |   |             |             |             |   |             |             |             |   |             |             |            |   |             |             |             |   |             |             |             |   |             |             |            |   |             |             |            |   |             |             |            |   |             |             |             |   |             |            |             |   |             |            |             |   |             |            |            |
| H                                                                                                                                                                                                                                                                                                                                                                                                                                                        | -3.65304400                                                                                                                                                                                                                                                                                                                                                                                                                                                                                                                                                                                                                                                                                                                                                                                                                                                                                                                                                                                                                                                                                                                                                                                                                                                                                                                                                                                                                                                                                                                                                                                                                                                                                                                                                                                                                                                                                                                                                                                                                                                                                   | -2.14299900 | -0.50605800 |             |             |   |            |            |             |   |            |             |            |   |            |             |             |   |            |             |             |   |            |             |             |   |            |             |             |   |             |             |             |   |             |             |             |   |             |             |             |   |             |             |             |   |             |             |             |   |             |             |             |   |             |             |             |   |             |             |             |   |             |             |            |   |             |             |             |   |             |             |             |   |             |             |            |   |             |             |            |   |             |             |            |   |             |             |             |   |             |            |             |   |             |            |             |   |             |            |            |
| C                                                                                                                                                                                                                                                                                                                                                                                                                                                        | -1.74261900                                                                                                                                                                                                                                                                                                                                                                                                                                                                                                                                                                                                                                                                                                                                                                                                                                                                                                                                                                                                                                                                                                                                                                                                                                                                                                                                                                                                                                                                                                                                                                                                                                                                                                                                                                                                                                                                                                                                                                                                                                                                                   | -0.96249800 | 1.66413900  |             |             |   |            |            |             |   |            |             |            |   |            |             |             |   |            |             |             |   |            |             |             |   |            |             |             |   |             |             |             |   |             |             |             |   |             |             |             |   |             |             |             |   |             |             |             |   |             |             |             |   |             |             |             |   |             |             |             |   |             |             |            |   |             |             |             |   |             |             |             |   |             |             |            |   |             |             |            |   |             |             |            |   |             |             |             |   |             |            |             |   |             |            |             |   |             |            |            |
| H                                                                                                                                                                                                                                                                                                                                                                                                                                                        | -0.75197700                                                                                                                                                                                                                                                                                                                                                                                                                                                                                                                                                                                                                                                                                                                                                                                                                                                                                                                                                                                                                                                                                                                                                                                                                                                                                                                                                                                                                                                                                                                                                                                                                                                                                                                                                                                                                                                                                                                                                                                                                                                                                   | -0.60620700 | 1.95756300  |             |             |   |            |            |             |   |            |             |            |   |            |             |             |   |            |             |             |   |            |             |             |   |            |             |             |   |             |             |             |   |             |             |             |   |             |             |             |   |             |             |             |   |             |             |             |   |             |             |             |   |             |             |             |   |             |             |             |   |             |             |            |   |             |             |             |   |             |             |             |   |             |             |            |   |             |             |            |   |             |             |            |   |             |             |             |   |             |            |             |   |             |            |             |   |             |            |            |
| H                                                                                                                                                                                                                                                                                                                                                                                                                                                        | -2.48297300                                                                                                                                                                                                                                                                                                                                                                                                                                                                                                                                                                                                                                                                                                                                                                                                                                                                                                                                                                                                                                                                                                                                                                                                                                                                                                                                                                                                                                                                                                                                                                                                                                                                                                                                                                                                                                                                                                                                                                                                                                                                                   | -0.49075900 | 2.31255900  |             |             |   |            |            |             |   |            |             |            |   |            |             |             |   |            |             |             |   |            |             |             |   |            |             |             |   |             |             |             |   |             |             |             |   |             |             |             |   |             |             |             |   |             |             |             |   |             |             |             |   |             |             |             |   |             |             |             |   |             |             |            |   |             |             |             |   |             |             |             |   |             |             |            |   |             |             |            |   |             |             |            |   |             |             |             |   |             |            |             |   |             |            |             |   |             |            |            |
| H                                                                                                                                                                                                                                                                                                                                                                                                                                                        | -1.77363900                                                                                                                                                                                                                                                                                                                                                                                                                                                                                                                                                                                                                                                                                                                                                                                                                                                                                                                                                                                                                                                                                                                                                                                                                                                                                                                                                                                                                                                                                                                                                                                                                                                                                                                                                                                                                                                                                                                                                                                                                                                                                   | -2.03565700 | 1.88536400  |             |             |   |            |            |             |   |            |             |            |   |            |             |             |   |            |             |             |   |            |             |             |   |            |             |             |   |             |             |             |   |             |             |             |   |             |             |             |   |             |             |             |   |             |             |             |   |             |             |             |   |             |             |             |   |             |             |             |   |             |             |            |   |             |             |             |   |             |             |             |   |             |             |            |   |             |             |            |   |             |             |            |   |             |             |             |   |             |            |             |   |             |            |             |   |             |            |            |
| C                                                                                                                                                                                                                                                                                                                                                                                                                                                        | -0.93761500                                                                                                                                                                                                                                                                                                                                                                                                                                                                                                                                                                                                                                                                                                                                                                                                                                                                                                                                                                                                                                                                                                                                                                                                                                                                                                                                                                                                                                                                                                                                                                                                                                                                                                                                                                                                                                                                                                                                                                                                                                                                                   | 1.77317500  | -0.08627600 |             |             |   |            |            |             |   |            |             |            |   |            |             |             |   |            |             |             |   |            |             |             |   |            |             |             |   |             |             |             |   |             |             |             |   |             |             |             |   |             |             |             |   |             |             |             |   |             |             |             |   |             |             |             |   |             |             |             |   |             |             |            |   |             |             |             |   |             |             |             |   |             |             |            |   |             |             |            |   |             |             |            |   |             |             |             |   |             |            |             |   |             |            |             |   |             |            |            |
| O                                                                                                                                                                                                                                                                                                                                                                                                                                                        | -0.19115200                                                                                                                                                                                                                                                                                                                                                                                                                                                                                                                                                                                                                                                                                                                                                                                                                                                                                                                                                                                                                                                                                                                                                                                                                                                                                                                                                                                                                                                                                                                                                                                                                                                                                                                                                                                                                                                                                                                                                                                                                                                                                   | 2.66566300  | -0.06677900 |             |             |   |            |            |             |   |            |             |            |   |            |             |             |   |            |             |             |   |            |             |             |   |            |             |             |   |             |             |             |   |             |             |             |   |             |             |             |   |             |             |             |   |             |             |             |   |             |             |             |   |             |             |             |   |             |             |             |   |             |             |            |   |             |             |             |   |             |             |             |   |             |             |            |   |             |             |            |   |             |             |            |   |             |             |             |   |             |            |             |   |             |            |             |   |             |            |            |
| O                                                                                                                                                                                                                                                                                                                                                                                                                                                        | -1.99993200                                                                                                                                                                                                                                                                                                                                                                                                                                                                                                                                                                                                                                                                                                                                                                                                                                                                                                                                                                                                                                                                                                                                                                                                                                                                                                                                                                                                                                                                                                                                                                                                                                                                                                                                                                                                                                                                                                                                                                                                                                                                                   | 1.24769000  | 0.01223600  |             |             |   |            |            |             |   |            |             |            |   |            |             |             |   |            |             |             |   |            |             |             |   |            |             |             |   |             |             |             |   |             |             |             |   |             |             |             |   |             |             |             |   |             |             |             |   |             |             |             |   |             |             |             |   |             |             |             |   |             |             |            |   |             |             |             |   |             |             |             |   |             |             |            |   |             |             |            |   |             |             |            |   |             |             |             |   |             |            |             |   |             |            |             |   |             |            |            |
| <p>Zero-point correction= 0.196858 (Hartree/Particle)<br/> Thermal correction to Energy= 0.210360<br/> Thermal correction to Enthalpy= 0.211304<br/> Thermal correction to Gibbs Free Energy= 0.156233</p>                                                                                                                                                                                                                                               |                                                                                                                                                                                                                                                                                                                                                                                                                                                                                                                                                                                                                                                                                                                                                                                                                                                                                                                                                                                                                                                                                                                                                                                                                                                                                                                                                                                                                                                                                                                                                                                                                                                                                                                                                                                                                                                                                                                                                                                                                                                                                               |             |             |             |             |   |            |            |             |   |            |             |            |   |            |             |             |   |            |             |             |   |            |             |             |   |            |             |             |   |             |             |             |   |             |             |             |   |             |             |             |   |             |             |             |   |             |             |             |   |             |             |             |   |             |             |             |   |             |             |             |   |             |             |            |   |             |             |             |   |             |             |             |   |             |             |            |   |             |             |            |   |             |             |            |   |             |             |             |   |             |            |             |   |             |            |             |   |             |            |            |

|                                                                                   |                             |             |             |             |
|-----------------------------------------------------------------------------------|-----------------------------|-------------|-------------|-------------|
| Sum of electronic and zero-point Energies=                                        | -579.990491                 |             |             |             |
| Sum of electronic and thermal Energies=                                           | -579.976989                 |             |             |             |
| Sum of electronic and thermal Enthalpies=                                         | -579.976045                 |             |             |             |
| Sum of electronic and thermal Free Energies=                                      | -580.031116                 |             |             |             |
| <b>AD<sub>3</sub></b>                                                             |                             |             |             |             |
| 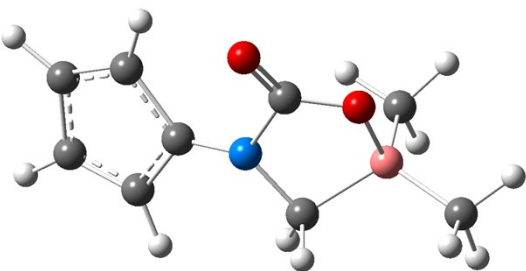 | C                           | 2.29390000  | 0.85287100  | 0.35178800  |
|                                                                                   | C                           | 3.46669100  | 0.22450200  | 0.45179600  |
|                                                                                   | C                           | 3.33430700  | -1.17454100 | -0.04571600 |
|                                                                                   | C                           | 2.07643200  | -1.39419300 | -0.43417400 |
|                                                                                   | H                           | 2.04074400  | 1.86371000  | 0.61393600  |
|                                                                                   | H                           | 4.38426000  | 0.64718500  | 0.83198300  |
|                                                                                   | H                           | 4.14583600  | -1.88581800 | -0.08231700 |
|                                                                                   | H                           | 1.65501400  | -2.29128600 | -0.85336400 |
|                                                                                   | C                           | 1.33803800  | -0.13256000 | -0.21300200 |
|                                                                                   | N                           | 0.09405000  | 0.04583300  | -0.45814100 |
|                                                                                   | C                           | -0.90128200 | -0.95250000 | -0.79347400 |
|                                                                                   | H                           | -1.16302900 | -0.82062700 | -1.84711900 |
|                                                                                   | H                           | -0.52513600 | -1.95379800 | -0.60851400 |
|                                                                                   | B                           | -2.17660600 | -0.43130400 | 0.15065300  |
|                                                                                   | C                           | -3.60861300 | -0.69529100 | -0.50511800 |
|                                                                                   | H                           | -4.40697400 | -0.24503700 | 0.09034300  |
|                                                                                   | H                           | -3.69113800 | -0.29471900 | -1.51958300 |
|                                                                                   | H                           | -3.82185000 | -1.76714000 | -0.55866800 |
|                                                                                   | C                           | -1.99978000 | -0.87329700 | 1.68622100  |
|                                                                                   | H                           | -0.99689100 | -0.68311100 | 2.08790000  |
| H                                                                                 | -2.70562900                 | -0.34370100 | 2.33111500  |             |
| H                                                                                 | -2.19609700                 | -1.94237100 | 1.80875000  |             |
| C                                                                                 | -0.62514100                 | 1.38346100  | -0.19133700 |             |
| O                                                                                 | -0.00559500                 | 2.39958900  | -0.25035400 |             |
| O                                                                                 | -1.83712300                 | 1.11562200  | 0.04002300  |             |
| Zero-point correction=                                                            | 0.200094 (Hartree/Particle) |             |             |             |
| Thermal correction to Energy=                                                     | 0.212657                    |             |             |             |
| Thermal correction to Enthalpy=                                                   | 0.213601                    |             |             |             |
| Thermal correction to Gibbs Free Energy=                                          | 0.161558                    |             |             |             |
| Sum of electronic and zero-point Energies=                                        | -580.004657                 |             |             |             |
| Sum of electronic and thermal Energies=                                           | -579.992094                 |             |             |             |
| Sum of electronic and thermal Enthalpies=                                         | -579.991150                 |             |             |             |
| Sum of electronic and thermal Free Energies=                                      | -580.043193                 |             |             |             |

## Cartesian Coordinates of the optimized geometries obtained in the reaction of IFLPs with CO<sub>2</sub> in Solvent phase

### Acetonitrile

2

|                                                                                     |                                                                                                                                                                                                                                                                                                                                                                                                                                                                                                                                                                                                                                                                                                                                                                                                                                                              |
|-------------------------------------------------------------------------------------|--------------------------------------------------------------------------------------------------------------------------------------------------------------------------------------------------------------------------------------------------------------------------------------------------------------------------------------------------------------------------------------------------------------------------------------------------------------------------------------------------------------------------------------------------------------------------------------------------------------------------------------------------------------------------------------------------------------------------------------------------------------------------------------------------------------------------------------------------------------|
| <b>2</b>                                                                            |                                                                                                                                                                                                                                                                                                                                                                                                                                                                                                                                                                                                                                                                                                                                                                                                                                                              |
| 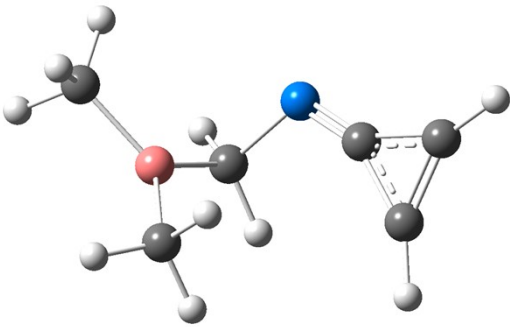   | C -0.57334800 -0.80035700 1.03584900<br>H -0.09004900 -0.32189800 1.89447600<br>H -1.09079300 -1.69768300 1.38065900<br>B -1.46946200 0.16664100 0.16193600<br>N 0.42045900 -1.20590200 0.01187300<br>C 1.42296400 -0.43740900 -0.10237900<br>C 2.64351100 -0.08454900 -0.71856000<br>C 2.20388100 0.69472100 0.26178500<br>H 3.41381100 -0.26528100 -1.45246700<br>H 2.37897300 1.57590200 0.85928000<br>C -1.13280900 1.70043500 0.08906600<br>H -0.43434100 1.84213800 -0.74807900<br>H -2.00857900 2.30985700 -0.15011600<br>H -0.64853700 2.10365800 0.98075900<br>C -2.61397300 -0.43777600 -0.72271800<br>H -2.82214300 0.12654600 -1.63476300<br>H -2.47000900 -1.49163200 -0.97136700<br>H -3.52559700 -0.38389400 -0.10944400                                                                                                                      |
| Zero-point correction=                                                              | 0.145901 (Hartree/Particle)                                                                                                                                                                                                                                                                                                                                                                                                                                                                                                                                                                                                                                                                                                                                                                                                                                  |
| Thermal correction to Energy=                                                       | 0.155860                                                                                                                                                                                                                                                                                                                                                                                                                                                                                                                                                                                                                                                                                                                                                                                                                                                     |
| Thermal correction to Enthalpy=                                                     | 0.156804                                                                                                                                                                                                                                                                                                                                                                                                                                                                                                                                                                                                                                                                                                                                                                                                                                                     |
| Thermal correction to Gibbs Free Energy=                                            | 0.110656                                                                                                                                                                                                                                                                                                                                                                                                                                                                                                                                                                                                                                                                                                                                                                                                                                                     |
| Sum of electronic and zero-point Energies=                                          | -313.992104                                                                                                                                                                                                                                                                                                                                                                                                                                                                                                                                                                                                                                                                                                                                                                                                                                                  |
| Sum of electronic and thermal Energies=                                             | -313.982146                                                                                                                                                                                                                                                                                                                                                                                                                                                                                                                                                                                                                                                                                                                                                                                                                                                  |
| Sum of electronic and thermal Enthalpies=                                           | -313.981202                                                                                                                                                                                                                                                                                                                                                                                                                                                                                                                                                                                                                                                                                                                                                                                                                                                  |
| Sum of electronic and thermal Free Energies=                                        | -314.027349                                                                                                                                                                                                                                                                                                                                                                                                                                                                                                                                                                                                                                                                                                                                                                                                                                                  |
| <b>CM<sub>2</sub></b>                                                               |                                                                                                                                                                                                                                                                                                                                                                                                                                                                                                                                                                                                                                                                                                                                                                                                                                                              |
|  | C 0.44562400 -0.95274700 -1.11078500<br>H 1.02585800 -0.69806700 -2.00330400<br>H 0.16955500 -2.01512000 -1.24294900<br>B 1.39022400 -0.95956000 0.15318500<br>N -0.73953400 -0.09501100 -1.05817700<br>C -1.71913700 -0.54665000 -0.39951700<br>C -3.02416500 -0.41307700 0.12849900<br>C -2.37290600 -1.53938500 0.38816600<br>H -3.93058000 0.15670600 0.26588200<br>H -2.39832000 -2.49967200 0.87938000<br>C 2.85685400 -1.48825000 -0.02766600<br>H 3.25669600 -1.98303900 0.86064800<br>H 2.99466500 -2.13661700 -0.89621500<br>H 3.48466600 -0.60160300 -0.19521500<br>C 0.88841700 -0.53339500 1.57678100<br>H 1.67668800 -0.06272500 2.17111700<br>H -0.00280400 0.09715400 1.59625800<br>H 0.63069700 -1.46226500 2.10576000<br>C 0.38994900 2.22784400 -0.01962600<br>O -0.59698800 2.64916300 0.40668000<br>O 1.41332200 1.86859800 -0.42107400 |
| Zero-point correction=                                                              | 0.158619 (Hartree/Particle)                                                                                                                                                                                                                                                                                                                                                                                                                                                                                                                                                                                                                                                                                                                                                                                                                                  |

|                                                                                     |             |             |             |             |
|-------------------------------------------------------------------------------------|-------------|-------------|-------------|-------------|
| Thermal correction to Energy=                                                       | 0.172342    |             |             |             |
| Thermal correction to Enthalpy=                                                     | 0.173287    |             |             |             |
| Thermal correction to Gibbs Free Energy=                                            | 0.117233    |             |             |             |
| Sum of electronic and zero-point Energies=                                          | -502.587292 |             |             |             |
| Sum of electronic and thermal Energies=                                             | -502.573569 |             |             |             |
| Sum of electronic and thermal Enthalpies=                                           | -502.572625 |             |             |             |
| Sum of electronic and thermal Free Energies=                                        | -502.628678 |             |             |             |
| <b>TS<sub>2</sub></b>                                                               |             |             |             |             |
| 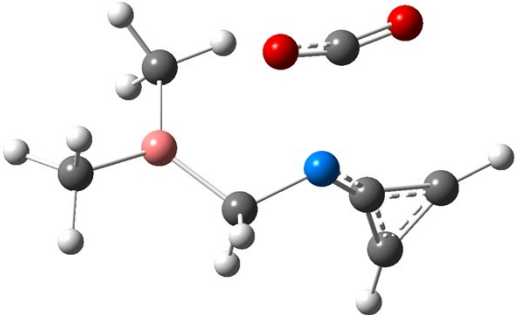   | C           | 0.56417400  | -0.91443900 | -0.81320800 |
|                                                                                     | H           | 0.86658800  | -0.67173500 | -1.83872100 |
|                                                                                     | H           | 0.35890600  | -1.99850200 | -0.81409700 |
|                                                                                     | B           | 1.79294900  | -0.70916800 | 0.15792200  |
|                                                                                     | N           | -0.62243300 | -0.14208900 | -0.47600100 |
|                                                                                     | C           | -1.69626300 | -0.72943000 | -0.16462800 |
|                                                                                     | C           | -3.04497400 | -0.67908800 | 0.25055200  |
|                                                                                     | C           | -2.50654800 | -1.87485100 | 0.05525000  |
|                                                                                     | H           | -3.92023000 | -0.11457800 | 0.53232000  |
|                                                                                     | H           | -2.64715400 | -2.94417600 | 0.07057300  |
|                                                                                     | C           | 3.22463400  | -1.04311600 | -0.38861600 |
|                                                                                     | H           | 3.92513000  | -1.37943800 | 0.37898700  |
|                                                                                     | H           | 3.23188300  | -1.74902000 | -1.22268900 |
|                                                                                     | H           | 3.62322900  | -0.09548600 | -0.77932500 |
|                                                                                     | C           | 1.60608100  | -0.25807200 | 1.64636200  |
|                                                                                     | H           | 2.43251600  | 0.36432200  | 2.00015900  |
|                                                                                     | H           | 0.65985600  | 0.23980600  | 1.86546100  |
|                                                                                     | H           | 1.64008700  | -1.17354800 | 2.25446200  |
| C                                                                                   | -0.19721500 | 2.00769300  | -0.17291000 |             |
| O                                                                                   | -1.23043200 | 2.38438900  | 0.21553400  |             |
| O                                                                                   | 0.92069900  | 1.99194100  | -0.51322700 |             |
| Zero-point correction= 0.158013 (Hartree/Particle)                                  |             |             |             |             |
| Thermal correction to Energy=                                                       | 0.171082    |             |             |             |
| Thermal correction to Enthalpy=                                                     | 0.172027    |             |             |             |
| Thermal correction to Gibbs Free Energy=                                            | 0.116886    |             |             |             |
| Sum of electronic and zero-point Energies=                                          | -502.584466 |             |             |             |
| Sum of electronic and thermal Energies=                                             | -502.571397 |             |             |             |
| Sum of electronic and thermal Enthalpies=                                           | -502.570453 |             |             |             |
| Sum of electronic and thermal Free Energies=                                        | -502.625594 |             |             |             |
| <b>AD<sub>2</sub></b>                                                               |             |             |             |             |
|  | C           | -0.41179200 | -1.18909400 | -0.25708100 |
|                                                                                     | H           | -0.24978200 | -1.98757300 | 0.46793800  |
|                                                                                     | H           | -0.34275700 | -1.60872700 | -1.26364100 |
|                                                                                     | B           | -1.76275900 | -0.27744500 | 0.01638900  |
|                                                                                     | N           | 0.65518500  | -0.18620300 | -0.10434800 |
|                                                                                     | C           | 1.92560900  | -0.42234400 | -0.03425800 |
|                                                                                     | C           | 3.23283000  | 0.00230000  | 0.09178600  |
|                                                                                     | C           | 2.98773100  | -1.30525500 | -0.01788100 |
|                                                                                     | H           | 3.93711900  | 0.81123600  | 0.19985800  |
|                                                                                     | H           | 3.35031500  | -2.31960900 | -0.06219700 |
|                                                                                     | C           | -2.31067700 | -0.43185100 | 1.52894500  |
|                                                                                     | H           | -1.51630000 | -0.30457000 | 2.27501700  |
|                                                                                     | H           | -3.09361100 | 0.29836000  | 1.76314300  |
|                                                                                     | H           | -2.74263600 | -1.42611200 | 1.69164600  |
|                                                                                     | C           | -2.89464400 | -0.42252500 | -1.11967800 |
|                                                                                     | H           | -3.73636700 | 0.26053800  | -0.95890400 |
|                                                                                     | H           | -2.50626600 | -0.23012500 | -2.12630400 |
|                                                                                     | H           | -3.30951800 | -1.43714500 | -1.12775000 |
| C                                                                                   | 0.15780400  | 1.17291100  | -0.06689600 |             |
| O                                                                                   | -1.12181200 | 1.16183900  | -0.09945700 |             |
| O                                                                                   | 0.91133000  | 2.11435200  | -0.02053400 |             |



|                                              |                             |
|----------------------------------------------|-----------------------------|
| Zero-point correction=                       | 0.163934 (Hartree/Particle) |
| Thermal correction to Energy=                | 0.175179                    |
| Thermal correction to Enthalpy=              | 0.176123                    |
| Thermal correction to Gibbs Free Energy=     | 0.127030                    |
| Sum of electronic and zero-point Energies=   | -502.625742                 |
| Sum of electronic and thermal Energies=      | -502.614497                 |
| Sum of electronic and thermal Enthalpies=    | -502.613553                 |
| Sum of electronic and thermal Free Energies= | -502.662646                 |

3

|                                                                                     |                                                                                                                                                                                                                                                                                                                                                                                                                                                                                                                                                                                                                                                                                                                                                                                                                                                                                                                                                                                                                                                                                                                                                                                                                                                                                                                                                                                                                                                                                                                                                                                                                                                                                                                                                                                                                         |                        |                             |                               |             |                                 |             |                                          |            |                                            |             |                                         |             |                                           |             |                                              |             |   |             |             |             |   |             |             |            |   |             |             |             |   |             |             |             |   |             |             |             |   |            |             |             |   |             |             |             |   |             |             |             |   |             |             |             |   |             |             |            |   |             |             |             |   |            |             |            |   |            |            |             |   |            |            |            |   |            |            |            |   |            |             |            |   |            |            |            |   |            |            |            |
|-------------------------------------------------------------------------------------|-------------------------------------------------------------------------------------------------------------------------------------------------------------------------------------------------------------------------------------------------------------------------------------------------------------------------------------------------------------------------------------------------------------------------------------------------------------------------------------------------------------------------------------------------------------------------------------------------------------------------------------------------------------------------------------------------------------------------------------------------------------------------------------------------------------------------------------------------------------------------------------------------------------------------------------------------------------------------------------------------------------------------------------------------------------------------------------------------------------------------------------------------------------------------------------------------------------------------------------------------------------------------------------------------------------------------------------------------------------------------------------------------------------------------------------------------------------------------------------------------------------------------------------------------------------------------------------------------------------------------------------------------------------------------------------------------------------------------------------------------------------------------------------------------------------------------|------------------------|-----------------------------|-------------------------------|-------------|---------------------------------|-------------|------------------------------------------|------------|--------------------------------------------|-------------|-----------------------------------------|-------------|-------------------------------------------|-------------|----------------------------------------------|-------------|---|-------------|-------------|-------------|---|-------------|-------------|------------|---|-------------|-------------|-------------|---|-------------|-------------|-------------|---|-------------|-------------|-------------|---|------------|-------------|-------------|---|-------------|-------------|-------------|---|-------------|-------------|-------------|---|-------------|-------------|-------------|---|-------------|-------------|------------|---|-------------|-------------|-------------|---|------------|-------------|------------|---|------------|------------|-------------|---|------------|------------|------------|---|------------|------------|------------|---|------------|-------------|------------|---|------------|------------|------------|---|------------|------------|------------|
| <b>3</b>                                                                            |                                                                                                                                                                                                                                                                                                                                                                                                                                                                                                                                                                                                                                                                                                                                                                                                                                                                                                                                                                                                                                                                                                                                                                                                                                                                                                                                                                                                                                                                                                                                                                                                                                                                                                                                                                                                                         |                        |                             |                               |             |                                 |             |                                          |            |                                            |             |                                         |             |                                           |             |                                              |             |   |             |             |             |   |             |             |            |   |             |             |             |   |             |             |             |   |             |             |             |   |            |             |             |   |             |             |             |   |             |             |             |   |             |             |             |   |             |             |            |   |             |             |             |   |            |             |            |   |            |            |             |   |            |            |            |   |            |            |            |   |            |             |            |   |            |            |            |   |            |            |            |
| 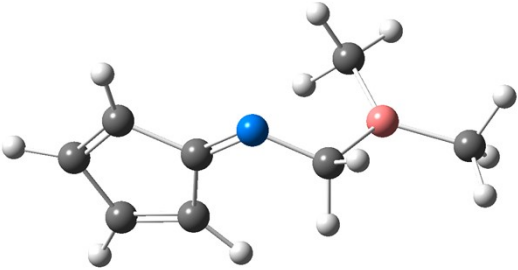   | <table border="1"> <tr><td>C</td><td>-2.25936100</td><td>-0.99817900</td><td>0.27953200</td></tr> <tr><td>C</td><td>-3.14605300</td><td>-0.00160900</td><td>0.37421100</td></tr> <tr><td>C</td><td>-2.52217100</td><td>1.24698300</td><td>-0.12276500</td></tr> <tr><td>C</td><td>-1.26614400</td><td>1.00209000</td><td>-0.51981300</td></tr> <tr><td>H</td><td>-2.37534900</td><td>-2.03602300</td><td>0.55132400</td></tr> <tr><td>H</td><td>-4.15778400</td><td>-0.06605600</td><td>0.74691900</td></tr> <tr><td>H</td><td>-3.02575200</td><td>2.20303300</td><td>-0.15189400</td></tr> <tr><td>H</td><td>-0.56547800</td><td>1.71419500</td><td>-0.92636500</td></tr> <tr><td>C</td><td>-1.00472300</td><td>-0.44393800</td><td>-0.28559100</td></tr> <tr><td>N</td><td>0.03959800</td><td>-1.14097700</td><td>-0.46890500</td></tr> <tr><td>C</td><td>1.24581200</td><td>-0.53380100</td><td>-0.96587100</td></tr> <tr><td>H</td><td>1.79435900</td><td>-1.27576200</td><td>-1.55638300</td></tr> <tr><td>H</td><td>1.06257700</td><td>0.31500300</td><td>-1.64219400</td></tr> <tr><td>B</td><td>2.23383100</td><td>0.00825900</td><td>0.15044700</td></tr> <tr><td>C</td><td>3.65266000</td><td>0.49282800</td><td>-0.30162100</td></tr> <tr><td>H</td><td>4.39313400</td><td>-0.19961700</td><td>0.11906900</td></tr> <tr><td>H</td><td>3.81092300</td><td>0.53341700</td><td>-1.38057000</td></tr> <tr><td>H</td><td>3.89349000</td><td>1.46901100</td><td>0.12993500</td></tr> <tr><td>C</td><td>1.77717000</td><td>0.07259700</td><td>1.64261300</td></tr> <tr><td>H</td><td>1.39499900</td><td>-0.89850100</td><td>1.97397300</td></tr> <tr><td>H</td><td>2.54602300</td><td>0.41196200</td><td>2.33760600</td></tr> <tr><td>H</td><td>0.91937900</td><td>0.75305200</td><td>1.72451700</td></tr> </table> | C                      | -2.25936100                 | -0.99817900                   | 0.27953200  | C                               | -3.14605300 | -0.00160900                              | 0.37421100 | C                                          | -2.52217100 | 1.24698300                              | -0.12276500 | C                                         | -1.26614400 | 1.00209000                                   | -0.51981300 | H | -2.37534900 | -2.03602300 | 0.55132400  | H | -4.15778400 | -0.06605600 | 0.74691900 | H | -3.02575200 | 2.20303300  | -0.15189400 | H | -0.56547800 | 1.71419500  | -0.92636500 | C | -1.00472300 | -0.44393800 | -0.28559100 | N | 0.03959800 | -1.14097700 | -0.46890500 | C | 1.24581200  | -0.53380100 | -0.96587100 | H | 1.79435900  | -1.27576200 | -1.55638300 | H | 1.06257700  | 0.31500300  | -1.64219400 | B | 2.23383100  | 0.00825900  | 0.15044700 | C | 3.65266000  | 0.49282800  | -0.30162100 | H | 4.39313400 | -0.19961700 | 0.11906900 | H | 3.81092300 | 0.53341700 | -1.38057000 | H | 3.89349000 | 1.46901100 | 0.12993500 | C | 1.77717000 | 0.07259700 | 1.64261300 | H | 1.39499900 | -0.89850100 | 1.97397300 | H | 2.54602300 | 0.41196200 | 2.33760600 | H | 0.91937900 | 0.75305200 | 1.72451700 |
| C                                                                                   | -2.25936100                                                                                                                                                                                                                                                                                                                                                                                                                                                                                                                                                                                                                                                                                                                                                                                                                                                                                                                                                                                                                                                                                                                                                                                                                                                                                                                                                                                                                                                                                                                                                                                                                                                                                                                                                                                                             | -0.99817900            | 0.27953200                  |                               |             |                                 |             |                                          |            |                                            |             |                                         |             |                                           |             |                                              |             |   |             |             |             |   |             |             |            |   |             |             |             |   |             |             |             |   |             |             |             |   |            |             |             |   |             |             |             |   |             |             |             |   |             |             |             |   |             |             |            |   |             |             |             |   |            |             |            |   |            |            |             |   |            |            |            |   |            |            |            |   |            |             |            |   |            |            |            |   |            |            |            |
| C                                                                                   | -3.14605300                                                                                                                                                                                                                                                                                                                                                                                                                                                                                                                                                                                                                                                                                                                                                                                                                                                                                                                                                                                                                                                                                                                                                                                                                                                                                                                                                                                                                                                                                                                                                                                                                                                                                                                                                                                                             | -0.00160900            | 0.37421100                  |                               |             |                                 |             |                                          |            |                                            |             |                                         |             |                                           |             |                                              |             |   |             |             |             |   |             |             |            |   |             |             |             |   |             |             |             |   |             |             |             |   |            |             |             |   |             |             |             |   |             |             |             |   |             |             |             |   |             |             |            |   |             |             |             |   |            |             |            |   |            |            |             |   |            |            |            |   |            |            |            |   |            |             |            |   |            |            |            |   |            |            |            |
| C                                                                                   | -2.52217100                                                                                                                                                                                                                                                                                                                                                                                                                                                                                                                                                                                                                                                                                                                                                                                                                                                                                                                                                                                                                                                                                                                                                                                                                                                                                                                                                                                                                                                                                                                                                                                                                                                                                                                                                                                                             | 1.24698300             | -0.12276500                 |                               |             |                                 |             |                                          |            |                                            |             |                                         |             |                                           |             |                                              |             |   |             |             |             |   |             |             |            |   |             |             |             |   |             |             |             |   |             |             |             |   |            |             |             |   |             |             |             |   |             |             |             |   |             |             |             |   |             |             |            |   |             |             |             |   |            |             |            |   |            |            |             |   |            |            |            |   |            |            |            |   |            |             |            |   |            |            |            |   |            |            |            |
| C                                                                                   | -1.26614400                                                                                                                                                                                                                                                                                                                                                                                                                                                                                                                                                                                                                                                                                                                                                                                                                                                                                                                                                                                                                                                                                                                                                                                                                                                                                                                                                                                                                                                                                                                                                                                                                                                                                                                                                                                                             | 1.00209000             | -0.51981300                 |                               |             |                                 |             |                                          |            |                                            |             |                                         |             |                                           |             |                                              |             |   |             |             |             |   |             |             |            |   |             |             |             |   |             |             |             |   |             |             |             |   |            |             |             |   |             |             |             |   |             |             |             |   |             |             |             |   |             |             |            |   |             |             |             |   |            |             |            |   |            |            |             |   |            |            |            |   |            |            |            |   |            |             |            |   |            |            |            |   |            |            |            |
| H                                                                                   | -2.37534900                                                                                                                                                                                                                                                                                                                                                                                                                                                                                                                                                                                                                                                                                                                                                                                                                                                                                                                                                                                                                                                                                                                                                                                                                                                                                                                                                                                                                                                                                                                                                                                                                                                                                                                                                                                                             | -2.03602300            | 0.55132400                  |                               |             |                                 |             |                                          |            |                                            |             |                                         |             |                                           |             |                                              |             |   |             |             |             |   |             |             |            |   |             |             |             |   |             |             |             |   |             |             |             |   |            |             |             |   |             |             |             |   |             |             |             |   |             |             |             |   |             |             |            |   |             |             |             |   |            |             |            |   |            |            |             |   |            |            |            |   |            |            |            |   |            |             |            |   |            |            |            |   |            |            |            |
| H                                                                                   | -4.15778400                                                                                                                                                                                                                                                                                                                                                                                                                                                                                                                                                                                                                                                                                                                                                                                                                                                                                                                                                                                                                                                                                                                                                                                                                                                                                                                                                                                                                                                                                                                                                                                                                                                                                                                                                                                                             | -0.06605600            | 0.74691900                  |                               |             |                                 |             |                                          |            |                                            |             |                                         |             |                                           |             |                                              |             |   |             |             |             |   |             |             |            |   |             |             |             |   |             |             |             |   |             |             |             |   |            |             |             |   |             |             |             |   |             |             |             |   |             |             |             |   |             |             |            |   |             |             |             |   |            |             |            |   |            |            |             |   |            |            |            |   |            |            |            |   |            |             |            |   |            |            |            |   |            |            |            |
| H                                                                                   | -3.02575200                                                                                                                                                                                                                                                                                                                                                                                                                                                                                                                                                                                                                                                                                                                                                                                                                                                                                                                                                                                                                                                                                                                                                                                                                                                                                                                                                                                                                                                                                                                                                                                                                                                                                                                                                                                                             | 2.20303300             | -0.15189400                 |                               |             |                                 |             |                                          |            |                                            |             |                                         |             |                                           |             |                                              |             |   |             |             |             |   |             |             |            |   |             |             |             |   |             |             |             |   |             |             |             |   |            |             |             |   |             |             |             |   |             |             |             |   |             |             |             |   |             |             |            |   |             |             |             |   |            |             |            |   |            |            |             |   |            |            |            |   |            |            |            |   |            |             |            |   |            |            |            |   |            |            |            |
| H                                                                                   | -0.56547800                                                                                                                                                                                                                                                                                                                                                                                                                                                                                                                                                                                                                                                                                                                                                                                                                                                                                                                                                                                                                                                                                                                                                                                                                                                                                                                                                                                                                                                                                                                                                                                                                                                                                                                                                                                                             | 1.71419500             | -0.92636500                 |                               |             |                                 |             |                                          |            |                                            |             |                                         |             |                                           |             |                                              |             |   |             |             |             |   |             |             |            |   |             |             |             |   |             |             |             |   |             |             |             |   |            |             |             |   |             |             |             |   |             |             |             |   |             |             |             |   |             |             |            |   |             |             |             |   |            |             |            |   |            |            |             |   |            |            |            |   |            |            |            |   |            |             |            |   |            |            |            |   |            |            |            |
| C                                                                                   | -1.00472300                                                                                                                                                                                                                                                                                                                                                                                                                                                                                                                                                                                                                                                                                                                                                                                                                                                                                                                                                                                                                                                                                                                                                                                                                                                                                                                                                                                                                                                                                                                                                                                                                                                                                                                                                                                                             | -0.44393800            | -0.28559100                 |                               |             |                                 |             |                                          |            |                                            |             |                                         |             |                                           |             |                                              |             |   |             |             |             |   |             |             |            |   |             |             |             |   |             |             |             |   |             |             |             |   |            |             |             |   |             |             |             |   |             |             |             |   |             |             |             |   |             |             |            |   |             |             |             |   |            |             |            |   |            |            |             |   |            |            |            |   |            |            |            |   |            |             |            |   |            |            |            |   |            |            |            |
| N                                                                                   | 0.03959800                                                                                                                                                                                                                                                                                                                                                                                                                                                                                                                                                                                                                                                                                                                                                                                                                                                                                                                                                                                                                                                                                                                                                                                                                                                                                                                                                                                                                                                                                                                                                                                                                                                                                                                                                                                                              | -1.14097700            | -0.46890500                 |                               |             |                                 |             |                                          |            |                                            |             |                                         |             |                                           |             |                                              |             |   |             |             |             |   |             |             |            |   |             |             |             |   |             |             |             |   |             |             |             |   |            |             |             |   |             |             |             |   |             |             |             |   |             |             |             |   |             |             |            |   |             |             |             |   |            |             |            |   |            |            |             |   |            |            |            |   |            |            |            |   |            |             |            |   |            |            |            |   |            |            |            |
| C                                                                                   | 1.24581200                                                                                                                                                                                                                                                                                                                                                                                                                                                                                                                                                                                                                                                                                                                                                                                                                                                                                                                                                                                                                                                                                                                                                                                                                                                                                                                                                                                                                                                                                                                                                                                                                                                                                                                                                                                                              | -0.53380100            | -0.96587100                 |                               |             |                                 |             |                                          |            |                                            |             |                                         |             |                                           |             |                                              |             |   |             |             |             |   |             |             |            |   |             |             |             |   |             |             |             |   |             |             |             |   |            |             |             |   |             |             |             |   |             |             |             |   |             |             |             |   |             |             |            |   |             |             |             |   |            |             |            |   |            |            |             |   |            |            |            |   |            |            |            |   |            |             |            |   |            |            |            |   |            |            |            |
| H                                                                                   | 1.79435900                                                                                                                                                                                                                                                                                                                                                                                                                                                                                                                                                                                                                                                                                                                                                                                                                                                                                                                                                                                                                                                                                                                                                                                                                                                                                                                                                                                                                                                                                                                                                                                                                                                                                                                                                                                                              | -1.27576200            | -1.55638300                 |                               |             |                                 |             |                                          |            |                                            |             |                                         |             |                                           |             |                                              |             |   |             |             |             |   |             |             |            |   |             |             |             |   |             |             |             |   |             |             |             |   |            |             |             |   |             |             |             |   |             |             |             |   |             |             |             |   |             |             |            |   |             |             |             |   |            |             |            |   |            |            |             |   |            |            |            |   |            |            |            |   |            |             |            |   |            |            |            |   |            |            |            |
| H                                                                                   | 1.06257700                                                                                                                                                                                                                                                                                                                                                                                                                                                                                                                                                                                                                                                                                                                                                                                                                                                                                                                                                                                                                                                                                                                                                                                                                                                                                                                                                                                                                                                                                                                                                                                                                                                                                                                                                                                                              | 0.31500300             | -1.64219400                 |                               |             |                                 |             |                                          |            |                                            |             |                                         |             |                                           |             |                                              |             |   |             |             |             |   |             |             |            |   |             |             |             |   |             |             |             |   |             |             |             |   |            |             |             |   |             |             |             |   |             |             |             |   |             |             |             |   |             |             |            |   |             |             |             |   |            |             |            |   |            |            |             |   |            |            |            |   |            |            |            |   |            |             |            |   |            |            |            |   |            |            |            |
| B                                                                                   | 2.23383100                                                                                                                                                                                                                                                                                                                                                                                                                                                                                                                                                                                                                                                                                                                                                                                                                                                                                                                                                                                                                                                                                                                                                                                                                                                                                                                                                                                                                                                                                                                                                                                                                                                                                                                                                                                                              | 0.00825900             | 0.15044700                  |                               |             |                                 |             |                                          |            |                                            |             |                                         |             |                                           |             |                                              |             |   |             |             |             |   |             |             |            |   |             |             |             |   |             |             |             |   |             |             |             |   |            |             |             |   |             |             |             |   |             |             |             |   |             |             |             |   |             |             |            |   |             |             |             |   |            |             |            |   |            |            |             |   |            |            |            |   |            |            |            |   |            |             |            |   |            |            |            |   |            |            |            |
| C                                                                                   | 3.65266000                                                                                                                                                                                                                                                                                                                                                                                                                                                                                                                                                                                                                                                                                                                                                                                                                                                                                                                                                                                                                                                                                                                                                                                                                                                                                                                                                                                                                                                                                                                                                                                                                                                                                                                                                                                                              | 0.49282800             | -0.30162100                 |                               |             |                                 |             |                                          |            |                                            |             |                                         |             |                                           |             |                                              |             |   |             |             |             |   |             |             |            |   |             |             |             |   |             |             |             |   |             |             |             |   |            |             |             |   |             |             |             |   |             |             |             |   |             |             |             |   |             |             |            |   |             |             |             |   |            |             |            |   |            |            |             |   |            |            |            |   |            |            |            |   |            |             |            |   |            |            |            |   |            |            |            |
| H                                                                                   | 4.39313400                                                                                                                                                                                                                                                                                                                                                                                                                                                                                                                                                                                                                                                                                                                                                                                                                                                                                                                                                                                                                                                                                                                                                                                                                                                                                                                                                                                                                                                                                                                                                                                                                                                                                                                                                                                                              | -0.19961700            | 0.11906900                  |                               |             |                                 |             |                                          |            |                                            |             |                                         |             |                                           |             |                                              |             |   |             |             |             |   |             |             |            |   |             |             |             |   |             |             |             |   |             |             |             |   |            |             |             |   |             |             |             |   |             |             |             |   |             |             |             |   |             |             |            |   |             |             |             |   |            |             |            |   |            |            |             |   |            |            |            |   |            |            |            |   |            |             |            |   |            |            |            |   |            |            |            |
| H                                                                                   | 3.81092300                                                                                                                                                                                                                                                                                                                                                                                                                                                                                                                                                                                                                                                                                                                                                                                                                                                                                                                                                                                                                                                                                                                                                                                                                                                                                                                                                                                                                                                                                                                                                                                                                                                                                                                                                                                                              | 0.53341700             | -1.38057000                 |                               |             |                                 |             |                                          |            |                                            |             |                                         |             |                                           |             |                                              |             |   |             |             |             |   |             |             |            |   |             |             |             |   |             |             |             |   |             |             |             |   |            |             |             |   |             |             |             |   |             |             |             |   |             |             |             |   |             |             |            |   |             |             |             |   |            |             |            |   |            |            |             |   |            |            |            |   |            |            |            |   |            |             |            |   |            |            |            |   |            |            |            |
| H                                                                                   | 3.89349000                                                                                                                                                                                                                                                                                                                                                                                                                                                                                                                                                                                                                                                                                                                                                                                                                                                                                                                                                                                                                                                                                                                                                                                                                                                                                                                                                                                                                                                                                                                                                                                                                                                                                                                                                                                                              | 1.46901100             | 0.12993500                  |                               |             |                                 |             |                                          |            |                                            |             |                                         |             |                                           |             |                                              |             |   |             |             |             |   |             |             |            |   |             |             |             |   |             |             |             |   |             |             |             |   |            |             |             |   |             |             |             |   |             |             |             |   |             |             |             |   |             |             |            |   |             |             |             |   |            |             |            |   |            |            |             |   |            |            |            |   |            |            |            |   |            |             |            |   |            |            |            |   |            |            |            |
| C                                                                                   | 1.77717000                                                                                                                                                                                                                                                                                                                                                                                                                                                                                                                                                                                                                                                                                                                                                                                                                                                                                                                                                                                                                                                                                                                                                                                                                                                                                                                                                                                                                                                                                                                                                                                                                                                                                                                                                                                                              | 0.07259700             | 1.64261300                  |                               |             |                                 |             |                                          |            |                                            |             |                                         |             |                                           |             |                                              |             |   |             |             |             |   |             |             |            |   |             |             |             |   |             |             |             |   |             |             |             |   |            |             |             |   |             |             |             |   |             |             |             |   |             |             |             |   |             |             |            |   |             |             |             |   |            |             |            |   |            |            |             |   |            |            |            |   |            |            |            |   |            |             |            |   |            |            |            |   |            |            |            |
| H                                                                                   | 1.39499900                                                                                                                                                                                                                                                                                                                                                                                                                                                                                                                                                                                                                                                                                                                                                                                                                                                                                                                                                                                                                                                                                                                                                                                                                                                                                                                                                                                                                                                                                                                                                                                                                                                                                                                                                                                                              | -0.89850100            | 1.97397300                  |                               |             |                                 |             |                                          |            |                                            |             |                                         |             |                                           |             |                                              |             |   |             |             |             |   |             |             |            |   |             |             |             |   |             |             |             |   |             |             |             |   |            |             |             |   |             |             |             |   |             |             |             |   |             |             |             |   |             |             |            |   |             |             |             |   |            |             |            |   |            |            |             |   |            |            |            |   |            |            |            |   |            |             |            |   |            |            |            |   |            |            |            |
| H                                                                                   | 2.54602300                                                                                                                                                                                                                                                                                                                                                                                                                                                                                                                                                                                                                                                                                                                                                                                                                                                                                                                                                                                                                                                                                                                                                                                                                                                                                                                                                                                                                                                                                                                                                                                                                                                                                                                                                                                                              | 0.41196200             | 2.33760600                  |                               |             |                                 |             |                                          |            |                                            |             |                                         |             |                                           |             |                                              |             |   |             |             |             |   |             |             |            |   |             |             |             |   |             |             |             |   |             |             |             |   |            |             |             |   |             |             |             |   |             |             |             |   |             |             |             |   |             |             |            |   |             |             |             |   |            |             |            |   |            |            |             |   |            |            |            |   |            |            |            |   |            |             |            |   |            |            |            |   |            |            |            |
| H                                                                                   | 0.91937900                                                                                                                                                                                                                                                                                                                                                                                                                                                                                                                                                                                                                                                                                                                                                                                                                                                                                                                                                                                                                                                                                                                                                                                                                                                                                                                                                                                                                                                                                                                                                                                                                                                                                                                                                                                                              | 0.75305200             | 1.72451700                  |                               |             |                                 |             |                                          |            |                                            |             |                                         |             |                                           |             |                                              |             |   |             |             |             |   |             |             |            |   |             |             |             |   |             |             |             |   |             |             |             |   |            |             |             |   |             |             |             |   |             |             |             |   |             |             |             |   |             |             |            |   |             |             |             |   |            |             |            |   |            |            |             |   |            |            |            |   |            |            |            |   |            |             |            |   |            |            |            |   |            |            |            |
|                                                                                     | <table border="1"> <tr> <td>Zero-point correction=</td> <td>0.182517 (Hartree/Particle)</td> </tr> <tr> <td>Thermal correction to Energy=</td> <td>0.193681</td> </tr> <tr> <td>Thermal correction to Enthalpy=</td> <td>0.194625</td> </tr> <tr> <td>Thermal correction to Gibbs Free Energy=</td> <td>0.144676</td> </tr> <tr> <td>Sum of electronic and zero-point Energies=</td> <td>-391.419826</td> </tr> <tr> <td>Sum of electronic and thermal Energies=</td> <td>-391.408663</td> </tr> <tr> <td>Sum of electronic and thermal Enthalpies=</td> <td>-391.407719</td> </tr> <tr> <td>Sum of electronic and thermal Free Energies=</td> <td>-391.457668</td> </tr> </table>                                                                                                                                                                                                                                                                                                                                                                                                                                                                                                                                                                                                                                                                                                                                                                                                                                                                                                                                                                                                                                                                                                                                      | Zero-point correction= | 0.182517 (Hartree/Particle) | Thermal correction to Energy= | 0.193681    | Thermal correction to Enthalpy= | 0.194625    | Thermal correction to Gibbs Free Energy= | 0.144676   | Sum of electronic and zero-point Energies= | -391.419826 | Sum of electronic and thermal Energies= | -391.408663 | Sum of electronic and thermal Enthalpies= | -391.407719 | Sum of electronic and thermal Free Energies= | -391.457668 |   |             |             |             |   |             |             |            |   |             |             |             |   |             |             |             |   |             |             |             |   |            |             |             |   |             |             |             |   |             |             |             |   |             |             |             |   |             |             |            |   |             |             |             |   |            |             |            |   |            |            |             |   |            |            |            |   |            |            |            |   |            |             |            |   |            |            |            |   |            |            |            |
| Zero-point correction=                                                              | 0.182517 (Hartree/Particle)                                                                                                                                                                                                                                                                                                                                                                                                                                                                                                                                                                                                                                                                                                                                                                                                                                                                                                                                                                                                                                                                                                                                                                                                                                                                                                                                                                                                                                                                                                                                                                                                                                                                                                                                                                                             |                        |                             |                               |             |                                 |             |                                          |            |                                            |             |                                         |             |                                           |             |                                              |             |   |             |             |             |   |             |             |            |   |             |             |             |   |             |             |             |   |             |             |             |   |            |             |             |   |             |             |             |   |             |             |             |   |             |             |             |   |             |             |            |   |             |             |             |   |            |             |            |   |            |            |             |   |            |            |            |   |            |            |            |   |            |             |            |   |            |            |            |   |            |            |            |
| Thermal correction to Energy=                                                       | 0.193681                                                                                                                                                                                                                                                                                                                                                                                                                                                                                                                                                                                                                                                                                                                                                                                                                                                                                                                                                                                                                                                                                                                                                                                                                                                                                                                                                                                                                                                                                                                                                                                                                                                                                                                                                                                                                |                        |                             |                               |             |                                 |             |                                          |            |                                            |             |                                         |             |                                           |             |                                              |             |   |             |             |             |   |             |             |            |   |             |             |             |   |             |             |             |   |             |             |             |   |            |             |             |   |             |             |             |   |             |             |             |   |             |             |             |   |             |             |            |   |             |             |             |   |            |             |            |   |            |            |             |   |            |            |            |   |            |            |            |   |            |             |            |   |            |            |            |   |            |            |            |
| Thermal correction to Enthalpy=                                                     | 0.194625                                                                                                                                                                                                                                                                                                                                                                                                                                                                                                                                                                                                                                                                                                                                                                                                                                                                                                                                                                                                                                                                                                                                                                                                                                                                                                                                                                                                                                                                                                                                                                                                                                                                                                                                                                                                                |                        |                             |                               |             |                                 |             |                                          |            |                                            |             |                                         |             |                                           |             |                                              |             |   |             |             |             |   |             |             |            |   |             |             |             |   |             |             |             |   |             |             |             |   |            |             |             |   |             |             |             |   |             |             |             |   |             |             |             |   |             |             |            |   |             |             |             |   |            |             |            |   |            |            |             |   |            |            |            |   |            |            |            |   |            |             |            |   |            |            |            |   |            |            |            |
| Thermal correction to Gibbs Free Energy=                                            | 0.144676                                                                                                                                                                                                                                                                                                                                                                                                                                                                                                                                                                                                                                                                                                                                                                                                                                                                                                                                                                                                                                                                                                                                                                                                                                                                                                                                                                                                                                                                                                                                                                                                                                                                                                                                                                                                                |                        |                             |                               |             |                                 |             |                                          |            |                                            |             |                                         |             |                                           |             |                                              |             |   |             |             |             |   |             |             |            |   |             |             |             |   |             |             |             |   |             |             |             |   |            |             |             |   |             |             |             |   |             |             |             |   |             |             |             |   |             |             |            |   |             |             |             |   |            |             |            |   |            |            |             |   |            |            |            |   |            |            |            |   |            |             |            |   |            |            |            |   |            |            |            |
| Sum of electronic and zero-point Energies=                                          | -391.419826                                                                                                                                                                                                                                                                                                                                                                                                                                                                                                                                                                                                                                                                                                                                                                                                                                                                                                                                                                                                                                                                                                                                                                                                                                                                                                                                                                                                                                                                                                                                                                                                                                                                                                                                                                                                             |                        |                             |                               |             |                                 |             |                                          |            |                                            |             |                                         |             |                                           |             |                                              |             |   |             |             |             |   |             |             |            |   |             |             |             |   |             |             |             |   |             |             |             |   |            |             |             |   |             |             |             |   |             |             |             |   |             |             |             |   |             |             |            |   |             |             |             |   |            |             |            |   |            |            |             |   |            |            |            |   |            |            |            |   |            |             |            |   |            |            |            |   |            |            |            |
| Sum of electronic and thermal Energies=                                             | -391.408663                                                                                                                                                                                                                                                                                                                                                                                                                                                                                                                                                                                                                                                                                                                                                                                                                                                                                                                                                                                                                                                                                                                                                                                                                                                                                                                                                                                                                                                                                                                                                                                                                                                                                                                                                                                                             |                        |                             |                               |             |                                 |             |                                          |            |                                            |             |                                         |             |                                           |             |                                              |             |   |             |             |             |   |             |             |            |   |             |             |             |   |             |             |             |   |             |             |             |   |            |             |             |   |             |             |             |   |             |             |             |   |             |             |             |   |             |             |            |   |             |             |             |   |            |             |            |   |            |            |             |   |            |            |            |   |            |            |            |   |            |             |            |   |            |            |            |   |            |            |            |
| Sum of electronic and thermal Enthalpies=                                           | -391.407719                                                                                                                                                                                                                                                                                                                                                                                                                                                                                                                                                                                                                                                                                                                                                                                                                                                                                                                                                                                                                                                                                                                                                                                                                                                                                                                                                                                                                                                                                                                                                                                                                                                                                                                                                                                                             |                        |                             |                               |             |                                 |             |                                          |            |                                            |             |                                         |             |                                           |             |                                              |             |   |             |             |             |   |             |             |            |   |             |             |             |   |             |             |             |   |             |             |             |   |            |             |             |   |             |             |             |   |             |             |             |   |             |             |             |   |             |             |            |   |             |             |             |   |            |             |            |   |            |            |             |   |            |            |            |   |            |            |            |   |            |             |            |   |            |            |            |   |            |            |            |
| Sum of electronic and thermal Free Energies=                                        | -391.457668                                                                                                                                                                                                                                                                                                                                                                                                                                                                                                                                                                                                                                                                                                                                                                                                                                                                                                                                                                                                                                                                                                                                                                                                                                                                                                                                                                                                                                                                                                                                                                                                                                                                                                                                                                                                             |                        |                             |                               |             |                                 |             |                                          |            |                                            |             |                                         |             |                                           |             |                                              |             |   |             |             |             |   |             |             |            |   |             |             |             |   |             |             |             |   |             |             |             |   |            |             |             |   |             |             |             |   |             |             |             |   |             |             |             |   |             |             |            |   |             |             |             |   |            |             |            |   |            |            |             |   |            |            |            |   |            |            |            |   |            |             |            |   |            |            |            |   |            |            |            |
| <b>CM<sub>3</sub></b>                                                               |                                                                                                                                                                                                                                                                                                                                                                                                                                                                                                                                                                                                                                                                                                                                                                                                                                                                                                                                                                                                                                                                                                                                                                                                                                                                                                                                                                                                                                                                                                                                                                                                                                                                                                                                                                                                                         |                        |                             |                               |             |                                 |             |                                          |            |                                            |             |                                         |             |                                           |             |                                              |             |   |             |             |             |   |             |             |            |   |             |             |             |   |             |             |             |   |             |             |             |   |            |             |             |   |             |             |             |   |             |             |             |   |             |             |             |   |             |             |            |   |             |             |             |   |            |             |            |   |            |            |             |   |            |            |            |   |            |            |            |   |            |             |            |   |            |            |            |   |            |            |            |
|  | <table border="1"> <tr><td>C</td><td>2.36383800</td><td>0.92177300</td><td>-0.36588300</td></tr> <tr><td>C</td><td>3.42313600</td><td>0.36051100</td><td>0.22860600</td></tr> <tr><td>C</td><td>3.13886900</td><td>-1.07603600</td><td>0.46733600</td></tr> <tr><td>C</td><td>1.91568000</td><td>-1.37969700</td><td>0.01117500</td></tr> <tr><td>H</td><td>2.23118700</td><td>1.94635700</td><td>-0.67980600</td></tr> <tr><td>H</td><td>4.34819800</td><td>0.84709700</td><td>0.50276200</td></tr> <tr><td>H</td><td>3.83230400</td><td>-1.75578700</td><td>0.94287500</td></tr> <tr><td>H</td><td>1.42590000</td><td>-2.34048800</td><td>0.04669700</td></tr> <tr><td>C</td><td>1.33150700</td><td>-0.13018400</td><td>-0.54479800</td></tr> <tr><td>N</td><td>0.18916600</td><td>0.09316200</td><td>-1.05307700</td></tr> <tr><td>C</td><td>-0.79020100</td><td>-0.96049500</td><td>-1.13993500</td></tr> <tr><td>H</td><td>-1.45022100</td><td>-0.75938300</td><td>-1.98762100</td></tr> <tr><td>H</td><td>-0.34022700</td><td>-1.95001000</td><td>-1.31852400</td></tr> <tr><td>B</td><td>-1.67453300</td><td>-1.17903900</td><td>0.16149800</td></tr> <tr><td>C</td><td>-3.02364100</td><td>-1.95471100</td><td>-0.01432600</td></tr> </table>                                                                                                                                                                                                                                                                                                                                                                                                                                                                                                                                                                   | C                      | 2.36383800                  | 0.92177300                    | -0.36588300 | C                               | 3.42313600  | 0.36051100                               | 0.22860600 | C                                          | 3.13886900  | -1.07603600                             | 0.46733600  | C                                         | 1.91568000  | -1.37969700                                  | 0.01117500  | H | 2.23118700  | 1.94635700  | -0.67980600 | H | 4.34819800  | 0.84709700  | 0.50276200 | H | 3.83230400  | -1.75578700 | 0.94287500  | H | 1.42590000  | -2.34048800 | 0.04669700  | C | 1.33150700  | -0.13018400 | -0.54479800 | N | 0.18916600 | 0.09316200  | -1.05307700 | C | -0.79020100 | -0.96049500 | -1.13993500 | H | -1.45022100 | -0.75938300 | -1.98762100 | H | -0.34022700 | -1.95001000 | -1.31852400 | B | -1.67453300 | -1.17903900 | 0.16149800 | C | -3.02364100 | -1.95471100 | -0.01432600 |   |            |             |            |   |            |            |             |   |            |            |            |   |            |            |            |   |            |             |            |   |            |            |            |   |            |            |            |
| C                                                                                   | 2.36383800                                                                                                                                                                                                                                                                                                                                                                                                                                                                                                                                                                                                                                                                                                                                                                                                                                                                                                                                                                                                                                                                                                                                                                                                                                                                                                                                                                                                                                                                                                                                                                                                                                                                                                                                                                                                              | 0.92177300             | -0.36588300                 |                               |             |                                 |             |                                          |            |                                            |             |                                         |             |                                           |             |                                              |             |   |             |             |             |   |             |             |            |   |             |             |             |   |             |             |             |   |             |             |             |   |            |             |             |   |             |             |             |   |             |             |             |   |             |             |             |   |             |             |            |   |             |             |             |   |            |             |            |   |            |            |             |   |            |            |            |   |            |            |            |   |            |             |            |   |            |            |            |   |            |            |            |
| C                                                                                   | 3.42313600                                                                                                                                                                                                                                                                                                                                                                                                                                                                                                                                                                                                                                                                                                                                                                                                                                                                                                                                                                                                                                                                                                                                                                                                                                                                                                                                                                                                                                                                                                                                                                                                                                                                                                                                                                                                              | 0.36051100             | 0.22860600                  |                               |             |                                 |             |                                          |            |                                            |             |                                         |             |                                           |             |                                              |             |   |             |             |             |   |             |             |            |   |             |             |             |   |             |             |             |   |             |             |             |   |            |             |             |   |             |             |             |   |             |             |             |   |             |             |             |   |             |             |            |   |             |             |             |   |            |             |            |   |            |            |             |   |            |            |            |   |            |            |            |   |            |             |            |   |            |            |            |   |            |            |            |
| C                                                                                   | 3.13886900                                                                                                                                                                                                                                                                                                                                                                                                                                                                                                                                                                                                                                                                                                                                                                                                                                                                                                                                                                                                                                                                                                                                                                                                                                                                                                                                                                                                                                                                                                                                                                                                                                                                                                                                                                                                              | -1.07603600            | 0.46733600                  |                               |             |                                 |             |                                          |            |                                            |             |                                         |             |                                           |             |                                              |             |   |             |             |             |   |             |             |            |   |             |             |             |   |             |             |             |   |             |             |             |   |            |             |             |   |             |             |             |   |             |             |             |   |             |             |             |   |             |             |            |   |             |             |             |   |            |             |            |   |            |            |             |   |            |            |            |   |            |            |            |   |            |             |            |   |            |            |            |   |            |            |            |
| C                                                                                   | 1.91568000                                                                                                                                                                                                                                                                                                                                                                                                                                                                                                                                                                                                                                                                                                                                                                                                                                                                                                                                                                                                                                                                                                                                                                                                                                                                                                                                                                                                                                                                                                                                                                                                                                                                                                                                                                                                              | -1.37969700            | 0.01117500                  |                               |             |                                 |             |                                          |            |                                            |             |                                         |             |                                           |             |                                              |             |   |             |             |             |   |             |             |            |   |             |             |             |   |             |             |             |   |             |             |             |   |            |             |             |   |             |             |             |   |             |             |             |   |             |             |             |   |             |             |            |   |             |             |             |   |            |             |            |   |            |            |             |   |            |            |            |   |            |            |            |   |            |             |            |   |            |            |            |   |            |            |            |
| H                                                                                   | 2.23118700                                                                                                                                                                                                                                                                                                                                                                                                                                                                                                                                                                                                                                                                                                                                                                                                                                                                                                                                                                                                                                                                                                                                                                                                                                                                                                                                                                                                                                                                                                                                                                                                                                                                                                                                                                                                              | 1.94635700             | -0.67980600                 |                               |             |                                 |             |                                          |            |                                            |             |                                         |             |                                           |             |                                              |             |   |             |             |             |   |             |             |            |   |             |             |             |   |             |             |             |   |             |             |             |   |            |             |             |   |             |             |             |   |             |             |             |   |             |             |             |   |             |             |            |   |             |             |             |   |            |             |            |   |            |            |             |   |            |            |            |   |            |            |            |   |            |             |            |   |            |            |            |   |            |            |            |
| H                                                                                   | 4.34819800                                                                                                                                                                                                                                                                                                                                                                                                                                                                                                                                                                                                                                                                                                                                                                                                                                                                                                                                                                                                                                                                                                                                                                                                                                                                                                                                                                                                                                                                                                                                                                                                                                                                                                                                                                                                              | 0.84709700             | 0.50276200                  |                               |             |                                 |             |                                          |            |                                            |             |                                         |             |                                           |             |                                              |             |   |             |             |             |   |             |             |            |   |             |             |             |   |             |             |             |   |             |             |             |   |            |             |             |   |             |             |             |   |             |             |             |   |             |             |             |   |             |             |            |   |             |             |             |   |            |             |            |   |            |            |             |   |            |            |            |   |            |            |            |   |            |             |            |   |            |            |            |   |            |            |            |
| H                                                                                   | 3.83230400                                                                                                                                                                                                                                                                                                                                                                                                                                                                                                                                                                                                                                                                                                                                                                                                                                                                                                                                                                                                                                                                                                                                                                                                                                                                                                                                                                                                                                                                                                                                                                                                                                                                                                                                                                                                              | -1.75578700            | 0.94287500                  |                               |             |                                 |             |                                          |            |                                            |             |                                         |             |                                           |             |                                              |             |   |             |             |             |   |             |             |            |   |             |             |             |   |             |             |             |   |             |             |             |   |            |             |             |   |             |             |             |   |             |             |             |   |             |             |             |   |             |             |            |   |             |             |             |   |            |             |            |   |            |            |             |   |            |            |            |   |            |            |            |   |            |             |            |   |            |            |            |   |            |            |            |
| H                                                                                   | 1.42590000                                                                                                                                                                                                                                                                                                                                                                                                                                                                                                                                                                                                                                                                                                                                                                                                                                                                                                                                                                                                                                                                                                                                                                                                                                                                                                                                                                                                                                                                                                                                                                                                                                                                                                                                                                                                              | -2.34048800            | 0.04669700                  |                               |             |                                 |             |                                          |            |                                            |             |                                         |             |                                           |             |                                              |             |   |             |             |             |   |             |             |            |   |             |             |             |   |             |             |             |   |             |             |             |   |            |             |             |   |             |             |             |   |             |             |             |   |             |             |             |   |             |             |            |   |             |             |             |   |            |             |            |   |            |            |             |   |            |            |            |   |            |            |            |   |            |             |            |   |            |            |            |   |            |            |            |
| C                                                                                   | 1.33150700                                                                                                                                                                                                                                                                                                                                                                                                                                                                                                                                                                                                                                                                                                                                                                                                                                                                                                                                                                                                                                                                                                                                                                                                                                                                                                                                                                                                                                                                                                                                                                                                                                                                                                                                                                                                              | -0.13018400            | -0.54479800                 |                               |             |                                 |             |                                          |            |                                            |             |                                         |             |                                           |             |                                              |             |   |             |             |             |   |             |             |            |   |             |             |             |   |             |             |             |   |             |             |             |   |            |             |             |   |             |             |             |   |             |             |             |   |             |             |             |   |             |             |            |   |             |             |             |   |            |             |            |   |            |            |             |   |            |            |            |   |            |            |            |   |            |             |            |   |            |            |            |   |            |            |            |
| N                                                                                   | 0.18916600                                                                                                                                                                                                                                                                                                                                                                                                                                                                                                                                                                                                                                                                                                                                                                                                                                                                                                                                                                                                                                                                                                                                                                                                                                                                                                                                                                                                                                                                                                                                                                                                                                                                                                                                                                                                              | 0.09316200             | -1.05307700                 |                               |             |                                 |             |                                          |            |                                            |             |                                         |             |                                           |             |                                              |             |   |             |             |             |   |             |             |            |   |             |             |             |   |             |             |             |   |             |             |             |   |            |             |             |   |             |             |             |   |             |             |             |   |             |             |             |   |             |             |            |   |             |             |             |   |            |             |            |   |            |            |             |   |            |            |            |   |            |            |            |   |            |             |            |   |            |            |            |   |            |            |            |
| C                                                                                   | -0.79020100                                                                                                                                                                                                                                                                                                                                                                                                                                                                                                                                                                                                                                                                                                                                                                                                                                                                                                                                                                                                                                                                                                                                                                                                                                                                                                                                                                                                                                                                                                                                                                                                                                                                                                                                                                                                             | -0.96049500            | -1.13993500                 |                               |             |                                 |             |                                          |            |                                            |             |                                         |             |                                           |             |                                              |             |   |             |             |             |   |             |             |            |   |             |             |             |   |             |             |             |   |             |             |             |   |            |             |             |   |             |             |             |   |             |             |             |   |             |             |             |   |             |             |            |   |             |             |             |   |            |             |            |   |            |            |             |   |            |            |            |   |            |            |            |   |            |             |            |   |            |            |            |   |            |            |            |
| H                                                                                   | -1.45022100                                                                                                                                                                                                                                                                                                                                                                                                                                                                                                                                                                                                                                                                                                                                                                                                                                                                                                                                                                                                                                                                                                                                                                                                                                                                                                                                                                                                                                                                                                                                                                                                                                                                                                                                                                                                             | -0.75938300            | -1.98762100                 |                               |             |                                 |             |                                          |            |                                            |             |                                         |             |                                           |             |                                              |             |   |             |             |             |   |             |             |            |   |             |             |             |   |             |             |             |   |             |             |             |   |            |             |             |   |             |             |             |   |             |             |             |   |             |             |             |   |             |             |            |   |             |             |             |   |            |             |            |   |            |            |             |   |            |            |            |   |            |            |            |   |            |             |            |   |            |            |            |   |            |            |            |
| H                                                                                   | -0.34022700                                                                                                                                                                                                                                                                                                                                                                                                                                                                                                                                                                                                                                                                                                                                                                                                                                                                                                                                                                                                                                                                                                                                                                                                                                                                                                                                                                                                                                                                                                                                                                                                                                                                                                                                                                                                             | -1.95001000            | -1.31852400                 |                               |             |                                 |             |                                          |            |                                            |             |                                         |             |                                           |             |                                              |             |   |             |             |             |   |             |             |            |   |             |             |             |   |             |             |             |   |             |             |             |   |            |             |             |   |             |             |             |   |             |             |             |   |             |             |             |   |             |             |            |   |             |             |             |   |            |             |            |   |            |            |             |   |            |            |            |   |            |            |            |   |            |             |            |   |            |            |            |   |            |            |            |
| B                                                                                   | -1.67453300                                                                                                                                                                                                                                                                                                                                                                                                                                                                                                                                                                                                                                                                                                                                                                                                                                                                                                                                                                                                                                                                                                                                                                                                                                                                                                                                                                                                                                                                                                                                                                                                                                                                                                                                                                                                             | -1.17903900            | 0.16149800                  |                               |             |                                 |             |                                          |            |                                            |             |                                         |             |                                           |             |                                              |             |   |             |             |             |   |             |             |            |   |             |             |             |   |             |             |             |   |             |             |             |   |            |             |             |   |             |             |             |   |             |             |             |   |             |             |             |   |             |             |            |   |             |             |             |   |            |             |            |   |            |            |             |   |            |            |            |   |            |            |            |   |            |             |            |   |            |            |            |   |            |            |            |
| C                                                                                   | -3.02364100                                                                                                                                                                                                                                                                                                                                                                                                                                                                                                                                                                                                                                                                                                                                                                                                                                                                                                                                                                                                                                                                                                                                                                                                                                                                                                                                                                                                                                                                                                                                                                                                                                                                                                                                                                                                             | -1.95471100            | -0.01432600                 |                               |             |                                 |             |                                          |            |                                            |             |                                         |             |                                           |             |                                              |             |   |             |             |             |   |             |             |            |   |             |             |             |   |             |             |             |   |             |             |             |   |            |             |             |   |             |             |             |   |             |             |             |   |             |             |             |   |             |             |            |   |             |             |             |   |            |             |            |   |            |            |             |   |            |            |            |   |            |            |            |   |            |             |            |   |            |            |            |   |            |            |            |

|                                                                                    |             |             |             |             |
|------------------------------------------------------------------------------------|-------------|-------------|-------------|-------------|
|                                                                                    | H           | -3.05807600 | -2.59493900 | -0.89858400 |
|                                                                                    | H           | -3.30650300 | -2.53518600 | 0.86662700  |
|                                                                                    | H           | -3.80420900 | -1.19263500 | -0.14731300 |
|                                                                                    | C           | -1.20288800 | -0.72255000 | 1.58162300  |
|                                                                                    | H           | -0.40838200 | 0.02598300  | 1.60977200  |
|                                                                                    | H           | -2.04042800 | -0.38662300 | 2.19989600  |
|                                                                                    | H           | -0.81067600 | -1.62072900 | 2.07950400  |
|                                                                                    | C           | -1.46569000 | 2.13449900  | 0.08493400  |
|                                                                                    | O           | -0.59381000 | 2.75125400  | 0.52163400  |
|                                                                                    | O           | -2.37044500 | 1.54883900  | -0.33471300 |
| Zero-point correction= 0.195220 (Hartree/Particle)                                 |             |             |             |             |
| Thermal correction to Energy= 0.210253                                             |             |             |             |             |
| Thermal correction to Enthalpy= 0.211197                                           |             |             |             |             |
| Thermal correction to Gibbs Free Energy= 0.151026                                  |             |             |             |             |
| Sum of electronic and zero-point Energies= -580.014832                             |             |             |             |             |
| Sum of electronic and thermal Energies= -579.999799                                |             |             |             |             |
| Sum of electronic and thermal Enthalpies= -579.998855                              |             |             |             |             |
| Sum of electronic and thermal Free Energies= -580.059026                           |             |             |             |             |
| <b>TS<sub>3</sub></b>                                                              |             |             |             |             |
| 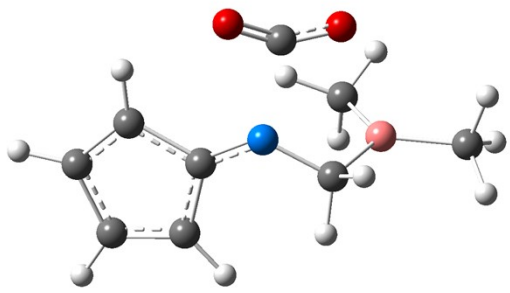 | C           | 2.30459500  | 0.68509900  | 0.29225000  |
|                                                                                    | C           | 3.37204300  | -0.10400700 | 0.44494200  |
|                                                                                    | C           | 3.05404000  | -1.46893600 | -0.04843400 |
|                                                                                    | C           | 1.79487600  | -1.50568000 | -0.49680700 |
|                                                                                    | H           | 2.19931400  | 1.72541000  | 0.54873100  |
|                                                                                    | H           | 4.32838600  | 0.17997800  | 0.85971300  |
|                                                                                    | H           | 3.75299700  | -2.29321500 | -0.03582700 |
|                                                                                    | H           | 1.27129300  | -2.34921700 | -0.91647800 |
|                                                                                    | C           | 1.22555200  | -0.14520500 | -0.30775600 |
|                                                                                    | N           | 0.04963900  | 0.26199500  | -0.56048700 |
|                                                                                    | C           | -1.01424200 | -0.58450800 | -1.03399400 |
|                                                                                    | H           | -1.53413000 | -0.05642900 | -1.83713300 |
|                                                                                    | H           | -0.64350900 | -1.53091400 | -1.44355100 |
|                                                                                    | B           | -2.05207500 | -0.95553600 | 0.11632200  |
|                                                                                    | C           | -3.52206400 | -1.27259700 | -0.31685000 |
|                                                                                    | H           | -3.61422000 | -1.62108100 | -1.34813500 |
|                                                                                    | H           | -4.03287200 | -1.96965200 | 0.35047000  |
|                                                                                    | H           | -4.07045400 | -0.32210000 | -0.25902300 |
|                                                                                    | C           | -1.58370000 | -1.12993100 | 1.59709200  |
|                                                                                    | H           | -0.68826600 | -0.57089400 | 1.87420200  |
| H                                                                                  | -2.37945000 | -0.91129300 | 2.31334500  |             |
| H                                                                                  | -1.35036400 | -2.19765000 | 1.71972200  |             |
| C                                                                                  | -0.68749200 | 1.99952000  | -0.02297200 |             |
| O                                                                                  | 0.17971000  | 2.78942200  | -0.14267600 |             |
| O                                                                                  | -1.80314400 | 1.71285800  | 0.25154400  |             |
| Zero-point correction= 0.195622 (Hartree/Particle)                                 |             |             |             |             |
| Thermal correction to Energy= 0.209458                                             |             |             |             |             |
| Thermal correction to Enthalpy= 0.210402                                           |             |             |             |             |
| Thermal correction to Gibbs Free Energy= 0.153497                                  |             |             |             |             |
| Sum of electronic and zero-point Energies= -580.003710                             |             |             |             |             |
| Sum of electronic and thermal Energies= -579.989874                                |             |             |             |             |
| Sum of electronic and thermal Enthalpies= -579.988930                              |             |             |             |             |
| Sum of electronic and thermal Free Energies= -580.045835                           |             |             |             |             |
| <b>AD<sub>3</sub></b>                                                              |             |             |             |             |
|                                                                                    | C           | 2.34652700  | 0.86479100  | 0.32555100  |
|                                                                                    | C           | 3.52112600  | 0.23655200  | 0.39195800  |
|                                                                                    | C           | 3.36376500  | -1.18204200 | -0.05499000 |
|                                                                                    | C           | 2.08829500  | -1.41193900 | -0.36978800 |
|                                                                                    | H           | 2.11376700  | 1.88159600  | 0.58259000  |
|                                                                                    | H           | 4.45715300  | 0.66388400  | 0.72034100  |



|                                                                                   |   |                             |             |             |
|-----------------------------------------------------------------------------------|---|-----------------------------|-------------|-------------|
| 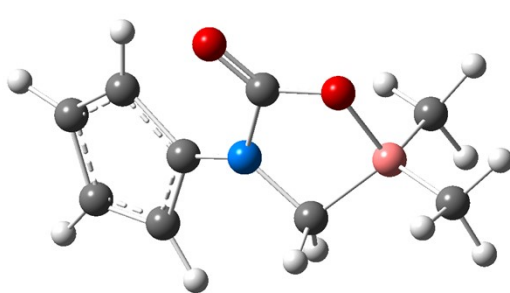 | H | 4.17692900                  | -1.89098200 | -0.10960600 |
|                                                                                   | H | 1.64085000                  | -2.31858800 | -0.74070700 |
|                                                                                   | C | 1.36709700                  | -0.13845100 | -0.16067100 |
|                                                                                   | N | 0.11031900                  | 0.02522700  | -0.36362600 |
|                                                                                   | C | -0.88187800                 | -1.00875000 | -0.66272800 |
|                                                                                   | H | -1.02768100                 | -1.00786400 | -1.74725000 |
|                                                                                   | H | -0.51616500                 | -1.97839100 | -0.33751200 |
|                                                                                   | B | -2.20656700                 | -0.41635200 | 0.12190000  |
|                                                                                   | C | -3.59297300                 | -0.66368500 | -0.64559500 |
|                                                                                   | H | -4.43345800                 | -0.17159400 | -0.14428000 |
|                                                                                   | H | -3.57260700                 | -0.30515000 | -1.68027400 |
|                                                                                   | H | -3.83033300                 | -1.73274900 | -0.68118700 |
|                                                                                   | C | -2.21066200                 | -0.79138400 | 1.69010800  |
|                                                                                   | H | -1.24679000                 | -0.59940800 | 2.17755300  |
|                                                                                   | H | -2.96917600                 | -0.22527200 | 2.24165900  |
|                                                                                   | H | -2.43598200                 | -1.85330700 | 1.83706700  |
|                                                                                   | C | -0.59200300                 | 1.34244000  | -0.18906700 |
|                                                                                   | O | 0.01000400                  | 2.37555100  | -0.26497700 |
|                                                                                   | O | -1.82896300                 | 1.11917400  | -0.00142000 |
| Zero-point correction=                                                            |   | 0.199793 (Hartree/Particle) |             |             |
| Thermal correction to Energy=                                                     |   | 0.212311                    |             |             |
| Thermal correction to Enthalpy=                                                   |   | 0.213255                    |             |             |
| Thermal correction to Gibbs Free Energy=                                          |   | 0.161192                    |             |             |
| Sum of electronic and zero-point Energies=                                        |   | -580.025968                 |             |             |
| Sum of electronic and thermal Energies=                                           |   | -580.013450                 |             |             |
| Sum of electronic and thermal Enthalpies=                                         |   | -580.012506                 |             |             |
| Sum of electronic and thermal Free Energies=                                      |   | -580.064568                 |             |             |

## Toluene

2

|                                                                                     |   |                             |             |             |
|-------------------------------------------------------------------------------------|---|-----------------------------|-------------|-------------|
| 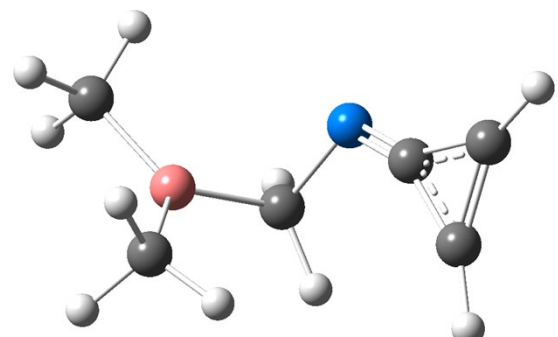 | 2 |                             |             |             |
|                                                                                     | C | -0.54250600                 | -0.71314300 | 1.01930400  |
|                                                                                     | H | -0.05614400                 | -0.17529500 | 1.84144700  |
|                                                                                     | H | -0.98937700                 | -1.62954900 | 1.40919600  |
|                                                                                     | B | -1.51750500                 | 0.16489200  | 0.13549600  |
|                                                                                     | N | 0.41244800                  | -1.08204400 | -0.04437300 |
|                                                                                     | C | 1.47215800                  | -0.39989200 | -0.11234700 |
|                                                                                     | C | 2.71198600                  | -0.10578800 | -0.73018100 |
|                                                                                     | C | 2.37982200                  | 0.60905400  | 0.33520000  |
|                                                                                     | H | 3.44303200                  | -0.28479300 | -1.50275300 |
|                                                                                     | H | 2.66643400                  | 1.40427000  | 1.00496700  |
|                                                                                     | C | -1.24783000                 | 1.70328300  | -0.02852500 |
|                                                                                     | H | -0.30059600                 | 2.05221800  | 0.38715400  |
|                                                                                     | H | -1.32545800                 | 2.03535600  | -1.06733600 |
|                                                                                     | H | -2.04864600                 | 2.22995600  | 0.50883000  |
|                                                                                     | C | -2.71029400                 | -0.53798900 | -0.59991200 |
|                                                                                     | H | -3.16730100                 | 0.04229900  | -1.40321400 |
|                                                                                     | H | -2.41055200                 | -1.51434600 | -0.99102300 |
|                                                                                     | H | -3.49101300                 | -0.74341700 | 0.14463300  |
| Zero-point correction=                                                              |   | 0.146096 (Hartree/Particle) |             |             |
| Thermal correction to Energy=                                                       |   | 0.156263                    |             |             |
| Thermal correction to Enthalpy=                                                     |   | 0.157207                    |             |             |
| Thermal correction to Gibbs Free Energy=                                            |   | 0.109577                    |             |             |
| Sum of electronic and zero-point Energies=                                          |   | -313.987032                 |             |             |
| Sum of electronic and thermal Energies=                                             |   | -313.976864                 |             |             |
| Sum of electronic and thermal Enthalpies=                                           |   | -313.975920                 |             |             |
| Sum of electronic and thermal Free Energies=                                        |   | -314.023550                 |             |             |

| <b>CM<sub>2</sub></b> |                                                                                                                                                                                                                                                                                                                                                                                                                                                                                                                                                                                                                                                                                                                                                                                                                                                                                                                                                                                                                                                   |                                                                                                                                                                                                                                                                                                                                                                                                                                                                                                                                                                                                                                                                                                                                                                                                                                                                                                                                                                                                                                                  |
|-----------------------|---------------------------------------------------------------------------------------------------------------------------------------------------------------------------------------------------------------------------------------------------------------------------------------------------------------------------------------------------------------------------------------------------------------------------------------------------------------------------------------------------------------------------------------------------------------------------------------------------------------------------------------------------------------------------------------------------------------------------------------------------------------------------------------------------------------------------------------------------------------------------------------------------------------------------------------------------------------------------------------------------------------------------------------------------|--------------------------------------------------------------------------------------------------------------------------------------------------------------------------------------------------------------------------------------------------------------------------------------------------------------------------------------------------------------------------------------------------------------------------------------------------------------------------------------------------------------------------------------------------------------------------------------------------------------------------------------------------------------------------------------------------------------------------------------------------------------------------------------------------------------------------------------------------------------------------------------------------------------------------------------------------------------------------------------------------------------------------------------------------|
|                       | C      0.15995700   -1.06755700   -0.76129900<br>H      0.52173400   -0.94200900   -1.78947100<br>H     -0.29289400   -2.07556300   -0.73730800<br>B      1.40928900   -1.12253000   0.20140300<br>N     -0.80881400   -0.01771800   -0.47322100<br>C     -1.98035900   -0.35699100   -0.16707000<br>C     -3.30491200   -0.02151100   0.21101800<br>C     -3.02062700   -1.30837600   0.08009300<br>H     -4.05625200   0.71480400   0.44871000<br>H     -3.39545800   -2.31771600   0.14247100<br>C      2.67346000   -1.92037600   -0.27662500<br>H      3.23210000   -2.38790100   0.53735200<br>H      2.47221900   -2.66524500   -1.04997700<br>H      3.35083000   -1.18063600   -0.72584900<br>C      1.39248400   -0.46393900   1.62318000<br>H      1.19441700   -1.27083300   2.34315500<br>H      2.36517900   -0.05249000   1.90594100<br>H      0.61768300   0.28967400   1.77362300<br>C      0.75212600   2.17340100   -0.21962400<br>O      1.59720300   1.60766400   -0.77248000<br>O     -0.02558700   2.81942200   0.33733600 |                                                                                                                                                                                                                                                                                                                                                                                                                                                                                                                                                                                                                                                                                                                                                                                                                                                                                                                                                                                                                                                  |
|                       | Zero-point correction=            0.158959 (Hartree/Particle)<br>Thermal correction to Energy=    0.172788<br>Thermal correction to Enthalpy=   0.173732<br>Thermal correction to Gibbs Free Energy=   0.116967<br>Sum of electronic and zero-point Energies=   -502.584204<br>Sum of electronic and thermal Energies=   -502.570374<br>Sum of electronic and thermal Enthalpies=   -502.569430<br>Sum of electronic and thermal Free Energies=   -502.626195                                                                                                                                                                                                                                                                                                                                                                                                                                                                                                                                                                                     |                                                                                                                                                                                                                                                                                                                                                                                                                                                                                                                                                                                                                                                                                                                                                                                                                                                                                                                                                                                                                                                  |
|                       | <b>TS<sub>2</sub></b>                                                                                                                                                                                                                                                                                                                                                                                                                                                                                                                                                                                                                                                                                                                                                                                                                                                                                                                                                                                                                             |                                                                                                                                                                                                                                                                                                                                                                                                                                                                                                                                                                                                                                                                                                                                                                                                                                                                                                                                                                                                                                                  |
|                       |                                                                                                                                                                                                                                                                                                                                                                                                                                                                                                                                                                                                                                                                                                                                                                                                                                                                                                                                                                                                                                                   | C      0.57203700   -0.95935200   -0.76087800<br>H      0.83324900   -0.75907300   -1.80600100<br>H      0.37168100   -2.04227000   -0.70402200<br>B      1.82808700   -0.68155600   0.16131300<br>N     -0.60145200   -0.17653900   -0.41549000<br>C     -1.70469200   -0.71542600   -0.13863900<br>C     -3.05658900   -0.59282700   0.25210900<br>C     -2.58749000   -1.81483900   0.04903100<br>H     -3.89737900   0.02429100   0.52482300<br>H     -2.79292900   -2.87318700   0.04534500<br>C      3.25127300   -0.96950200   -0.42975500<br>H      4.00207500   -1.22986100   0.31889200<br>H      3.26310900   -1.71469600   -1.22886200<br>H      3.58132800   -0.02560800   -0.88638900<br>C      1.67198200   -0.21457800   1.64811100<br>H      1.84758900   -1.09126000   2.28686300<br>H      2.44220000   0.50975800   1.92665700<br>H      0.69306000   0.19067500   1.90860200<br>C     -0.22130800   1.90662900   -0.19682300<br>O      0.90556000   1.92235500   -0.52077400<br>O     -1.25875300   2.30441300   0.16790200 |
|                       |                                                                                                                                                                                                                                                                                                                                                                                                                                                                                                                                                                                                                                                                                                                                                                                                                                                                                                                                                                                                                                                   | Zero-point correction=            0.158929 (Hartree/Particle)<br>Thermal correction to Energy=    0.171811<br>Thermal correction to Enthalpy=   0.172755<br>Thermal correction to Gibbs Free Energy=   0.118609<br>Sum of electronic and zero-point Energies=   -502.580594<br>Sum of electronic and thermal Energies=   -502.567713<br>Sum of electronic and thermal Enthalpies=   -502.566768                                                                                                                                                                                                                                                                                                                                                                                                                                                                                                                                                                                                                                                  |

|                                                                                   |            |                             |             |             |
|-----------------------------------------------------------------------------------|------------|-----------------------------|-------------|-------------|
| Sum of electronic and thermal Free Energies=                                      |            | -502.620914                 |             |             |
| <b>AD<sub>2</sub></b>                                                             |            |                             |             |             |
| 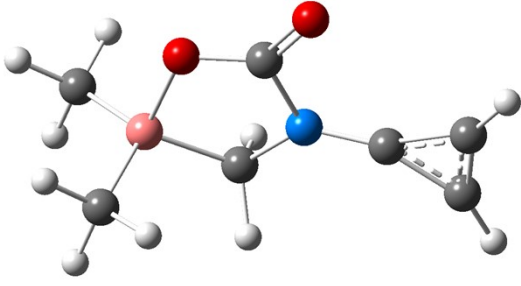 | C          | -0.43278700                 | -1.18668200 | -0.33431400 |
|                                                                                   | H          | -0.27185400                 | -2.02899500 | 0.33947600  |
|                                                                                   | H          | -0.39504800                 | -1.54193900 | -1.36714600 |
|                                                                                   | B          | -1.76805800                 | -0.27251200 | 0.02326700  |
|                                                                                   | N          | 0.64767200                  | -0.20583000 | -0.14598700 |
|                                                                                   | C          | 1.90716300                  | -0.43743700 | -0.05049100 |
|                                                                                   | C          | 3.20719100                  | 0.01171300  | 0.12309300  |
|                                                                                   | C          | 2.99880100                  | -1.29529400 | -0.02454200 |
|                                                                                   | H          | 3.88278500                  | 0.83796400  | 0.26878100  |
|                                                                                   | H          | 3.39086000                  | -2.29729100 | -0.08337600 |
|                                                                                   | C          | -2.22494200                 | -0.45239900 | 1.55960300  |
|                                                                                   | H          | -1.39191000                 | -0.34971800 | 2.26675700  |
|                                                                                   | H          | -2.98147900                 | 0.28350800  | 1.84969900  |
|                                                                                   | H          | -2.66309600                 | -1.44283500 | 1.72619800  |
|                                                                                   | C          | -2.95164800                 | -0.39198300 | -1.05442700 |
|                                                                                   | H          | -3.77857900                 | 0.29019500  | -0.83300400 |
|                                                                                   | H          | -2.61814200                 | -0.17623400 | -2.07544400 |
|                                                                                   | H          | -3.37212000                 | -1.40389500 | -1.06197300 |
|                                                                                   | C          | 0.15462700                  | 1.17935800  | -0.07724300 |
|                                                                                   | O          | -1.11659700                 | 1.16643300  | -0.10206700 |
| O                                                                                 | 0.93593900 | 2.09218600                  | -0.01974100 |             |
| Zero-point correction=                                                            |            | 0.164286 (Hartree/Particle) |             |             |
| Thermal correction to Energy=                                                     |            | 0.175530                    |             |             |
| Thermal correction to Enthalpy=                                                   |            | 0.176474                    |             |             |
| Thermal correction to Gibbs Free Energy=                                          |            | 0.127460                    |             |             |
| Sum of electronic and zero-point Energies=                                        |            | -502.612228                 |             |             |
| Sum of electronic and thermal Energies=                                           |            | -502.600985                 |             |             |
| Sum of electronic and thermal Enthalpies=                                         |            | -502.600040                 |             |             |
| Sum of electronic and thermal Free Energies=                                      |            | -502.649054                 |             |             |

3

|                                                                                     |            |                             |             |             |
|-------------------------------------------------------------------------------------|------------|-----------------------------|-------------|-------------|
| <b>3</b>                                                                            |            |                             |             |             |
| 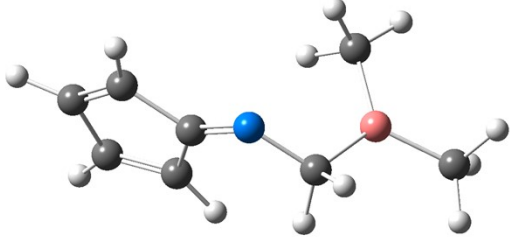 | C          | -2.26024200                 | -1.01385600 | 0.21397200  |
|                                                                                     | C          | -3.14771800                 | -0.02622600 | 0.37312700  |
|                                                                                     | C          | -2.52425700                 | 1.25277200  | -0.04006000 |
|                                                                                     | C          | -1.26774200                 | 1.03526300  | -0.45116900 |
|                                                                                     | H          | -2.37589600                 | -2.06734900 | 0.41703000  |
|                                                                                     | H          | -4.15969800                 | -0.11561700 | 0.73999100  |
|                                                                                     | H          | -3.02838400                 | 2.20839200  | -0.00635900 |
|                                                                                     | H          | -0.56716400                 | 1.77314900  | -0.80879700 |
|                                                                                     | C          | -1.00564200                 | -0.42294700 | -0.31288300 |
|                                                                                     | N          | 0.03883900                  | -1.10592700 | -0.54225000 |
|                                                                                     | C          | 1.24467900                  | -0.46714900 | -0.99888400 |
|                                                                                     | H          | 1.79281300                  | -1.16880700 | -1.63724200 |
|                                                                                     | H          | 1.06148800                  | 0.42418400  | -1.61806500 |
|                                                                                     | B          | 2.23494600                  | -0.00202800 | 0.14961800  |
|                                                                                     | C          | 3.65053200                  | 0.51802200  | -0.27231400 |
|                                                                                     | H          | 4.39617300                  | -0.19496900 | 0.10221100  |
|                                                                                     | H          | 3.80671800                  | 0.62966200  | -1.34654900 |
|                                                                                     | H          | 3.88577900                  | 1.46593500  | 0.22113200  |
|                                                                                     | C          | 1.78542300                  | -0.04706200 | 1.64469100  |
|                                                                                     | H          | 1.41160900                  | -1.04222100 | 1.90724300  |
| H                                                                                   | 2.55600900 | 0.24659000                  | 2.35836700  |             |
| H                                                                                   | 0.92376400 | 0.61978200                  | 1.77982200  |             |
| Zero-point correction=                                                              |            | 0.182489 (Hartree/Particle) |             |             |

|                                                                                     |                             |             |             |             |
|-------------------------------------------------------------------------------------|-----------------------------|-------------|-------------|-------------|
| Thermal correction to Energy=                                                       | 0.193668                    |             |             |             |
| Thermal correction to Enthalpy=                                                     | 0.194612                    |             |             |             |
| Thermal correction to Gibbs Free Energy=                                            | 0.144541                    |             |             |             |
| Sum of electronic and zero-point Energies=                                          | -391.419844                 |             |             |             |
| Sum of electronic and thermal Energies=                                             | -391.408665                 |             |             |             |
| Sum of electronic and thermal Enthalpies=                                           | -391.407720                 |             |             |             |
| Sum of electronic and thermal Free Energies=                                        | -391.457792                 |             |             |             |
| <b>CM<sub>3</sub></b>                                                               |                             |             |             |             |
| 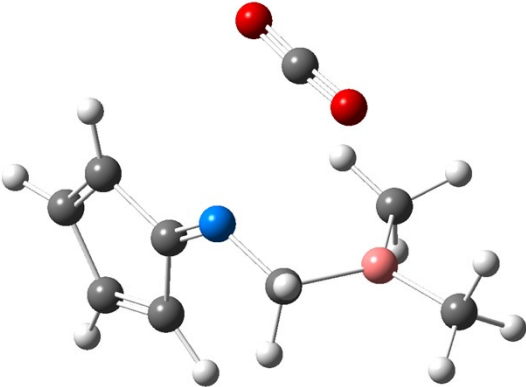   | C                           | 2.34660600  | 0.98376400  | -0.17681700 |
|                                                                                     | C                           | 3.47421100  | 0.42074500  | 0.26939600  |
|                                                                                     | C                           | 3.29667900  | -1.05037200 | 0.30770300  |
|                                                                                     | C                           | 2.06862100  | -1.37241500 | -0.11927900 |
|                                                                                     | H                           | 2.12500200  | 2.02892000  | -0.32692500 |
|                                                                                     | H                           | 4.38147500  | 0.92888400  | 0.56148400  |
|                                                                                     | H                           | 4.05966700  | -1.74199900 | 0.63620500  |
|                                                                                     | H                           | 1.65028700  | -2.36281200 | -0.20014400 |
|                                                                                     | C                           | 1.37209500  | -0.10085900 | -0.45179100 |
|                                                                                     | N                           | 0.19019200  | 0.11739600  | -0.85892600 |
|                                                                                     | C                           | -0.74241300 | -0.96110500 | -1.05041500 |
|                                                                                     | H                           | -1.36720400 | -0.72984900 | -1.91826600 |
|                                                                                     | H                           | -0.26024100 | -1.92812900 | -1.26244300 |
|                                                                                     | B                           | -1.70040500 | -1.22757400 | 0.18842500  |
|                                                                                     | C                           | -2.99479400 | -2.07072400 | -0.06756900 |
|                                                                                     | H                           | -3.27511300 | -2.69806100 | 0.78154200  |
|                                                                                     | H                           | -3.81302600 | -1.34841500 | -0.19449800 |
|                                                                                     | H                           | -2.97071600 | -2.67889400 | -0.97402300 |
|                                                                                     | C                           | -1.32887900 | -0.75206600 | 1.63098400  |
|                                                                                     | H                           | -0.66092600 | 0.10952300  | 1.68854600  |
| H                                                                                   | -2.20481300                 | -0.57931100 | 2.26048100  |             |
| H                                                                                   | -0.78545500                 | -1.58801800 | 2.09637600  |             |
| C                                                                                   | -1.55702700                 | 2.13483900  | -0.01357800 |             |
| O                                                                                   | -0.73608700                 | 2.83655500  | 0.39125400  |             |
| O                                                                                   | -2.42876900                 | 1.47762300  | -0.39747600 |             |
| Zero-point correction=                                                              | 0.195699 (Hartree/Particle) |             |             |             |
| Thermal correction to Energy=                                                       | 0.210719                    |             |             |             |
| Thermal correction to Enthalpy=                                                     | 0.211663                    |             |             |             |
| Thermal correction to Gibbs Free Energy=                                            | 0.151327                    |             |             |             |
| Sum of electronic and zero-point Energies=                                          | -580.012533                 |             |             |             |
| Sum of electronic and thermal Energies=                                             | -579.997513                 |             |             |             |
| Sum of electronic and thermal Enthalpies=                                           | -579.996569                 |             |             |             |
| Sum of electronic and thermal Free Energies=                                        | -580.056904                 |             |             |             |
| <b>TS<sub>3</sub></b>                                                               |                             |             |             |             |
|  | C                           | 2.32687100  | 0.81351900  | 0.24021400  |
|                                                                                     | C                           | 3.48083000  | 0.15879700  | 0.38945700  |
|                                                                                     | C                           | 3.29787700  | -1.26289400 | 0.00037300  |
|                                                                                     | C                           | 2.03368000  | -1.46888900 | -0.38009700 |
|                                                                                     | H                           | 2.11280200  | 1.85099100  | 0.43005500  |
|                                                                                     | H                           | 4.41519300  | 0.57491900  | 0.73613300  |
|                                                                                     | H                           | 4.08478100  | -2.00292100 | 0.02684800  |
|                                                                                     | H                           | 1.59437400  | -2.39093700 | -0.72241000 |
|                                                                                     | C                           | 1.32439800  | -0.16768300 | -0.25514300 |
|                                                                                     | N                           | 0.10951600  | 0.10277500  | -0.50101600 |
|                                                                                     | C                           | -0.88714300 | -0.85708500 | -0.90359500 |
|                                                                                     | H                           | -1.23985700 | -0.56273600 | -1.89617900 |
|                                                                                     | H                           | -0.48521900 | -1.87242800 | -0.96902200 |
|                                                                                     | B                           | -2.10832500 | -0.81990600 | 0.14014400  |
|                                                                                     | C                           | -3.55660300 | -1.08122500 | -0.40693500 |
|                                                                                     | H                           | -4.34114300 | -0.81210300 | 0.30263100  |
|                                                                                     | H                           | -3.75622900 | -0.58041100 | -1.35636600 |

|                                                          |   |             |             |             |
|----------------------------------------------------------|---|-------------|-------------|-------------|
|                                                          | H | -3.65819400 | -2.15836200 | -0.59440100 |
|                                                          | C | -1.79364300 | -0.95178600 | 1.67451900  |
|                                                          | H | -0.80861600 | -0.58765100 | 1.97544900  |
|                                                          | H | -2.54731200 | -0.46082700 | 2.29375800  |
|                                                          | H | -1.83288100 | -2.01843700 | 1.93198400  |
|                                                          | C | -0.84569600 | 1.80483100  | -0.10671700 |
|                                                          | O | -0.04963900 | 2.66481100  | -0.10393500 |
|                                                          | O | -1.95612600 | 1.39462600  | -0.00413400 |
| Zero-point correction= 0.196623 (Hartree/Particle)       |   |             |             |             |
| Thermal correction to Energy= 0.210273                   |   |             |             |             |
| Thermal correction to Enthalpy= 0.211217                 |   |             |             |             |
| Thermal correction to Gibbs Free Energy= 0.155450        |   |             |             |             |
| Sum of electronic and zero-point Energies= -579.999886   |   |             |             |             |
| Sum of electronic and thermal Energies= -579.986237      |   |             |             |             |
| Sum of electronic and thermal Enthalpies= -579.985292    |   |             |             |             |
| Sum of electronic and thermal Free Energies= -580.041059 |   |             |             |             |
| <b>AD<sub>3</sub></b>                                    |   |             |             |             |
|                                                          | C | 2.32656600  | 0.85919500  | 0.33588500  |
|                                                          | C | 3.50026800  | 0.23122500  | 0.41759000  |
|                                                          | C | 3.35364800  | -1.17899200 | -0.04943100 |
|                                                          | C | 2.08577600  | -1.40542500 | -0.39671500 |
|                                                          | H | 2.08483900  | 1.87425900  | 0.59160800  |
|                                                          | H | 4.42832400  | 0.65828000  | 0.76721700  |
|                                                          | H | 4.16565200  | -1.88968000 | -0.09490000 |
|                                                          | H | 1.65054200  | -2.30893200 | -0.78825800 |
|                                                          | C | 1.35628800  | -0.13697900 | -0.18312600 |
|                                                          | N | 0.10473000  | 0.03212300  | -0.40153900 |
|                                                          | C | -0.88935000 | -0.98531700 | -0.71803800 |
|                                                          | H | -1.08275400 | -0.92798100 | -1.79367500 |
|                                                          | H | -0.52093600 | -1.97151900 | -0.45170400 |
|                                                          | B | -2.19636200 | -0.42069500 | 0.13294100  |
|                                                          | C | -3.60177000 | -0.67514300 | -0.58778100 |
|                                                          | H | -4.42588900 | -0.20211900 | -0.04496100 |
|                                                          | H | -3.62941200 | -0.29671600 | -1.61476100 |
|                                                          | H | -3.82957000 | -1.74559900 | -0.63218800 |
|                                                          | C | -2.12797200 | -0.82593000 | 1.68924800  |
|                                                          | H | -1.15020500 | -0.63784600 | 2.15032900  |
|                                                          | H | -2.86722600 | -0.27454800 | 2.27838500  |
|                                                          | H | -2.34418900 | -1.89066400 | 1.82589200  |
|                                                          | C | -0.60656100 | 1.36133100  | -0.18976000 |
|                                                          | O | 0.00593700  | 2.38474300  | -0.25828100 |
|                                                          | O | -1.83241600 | 1.11874200  | 0.01401100  |
| Zero-point correction= 0.200350 (Hartree/Particle)       |   |             |             |             |
| Thermal correction to Energy= 0.212844                   |   |             |             |             |
| Thermal correction to Enthalpy= 0.213788                 |   |             |             |             |
| Thermal correction to Gibbs Free Energy= 0.161810        |   |             |             |             |
| Sum of electronic and zero-point Energies= -580.018983   |   |             |             |             |
| Sum of electronic and thermal Energies= -580.006488      |   |             |             |             |
| Sum of electronic and thermal Enthalpies= -580.005544    |   |             |             |             |
| Sum of electronic and thermal Free Energies= -580.057522 |   |             |             |             |

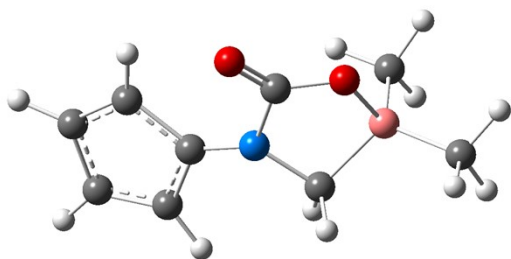

Supplement: d3cp02928j1.pdf [file d3cp02928j1.pdf]
